# Supplementary material for: Oleic acid: a benign Brønsted acidic catalyst for densely substituted indole derivative synthesis
Source: Royal Society of Chemistry journal article supplement (doi:10.1039/c5ra02906f), 2015-01-01
Supplement: c5ra02906f1.pdf [file c5ra02906f1.pdf]

## Oleic acid: A benign Brønsted acidic catalyst for densely substituted indole derivatives synthesis

Asaithampi Ganesan,<sup>a</sup> Jagatheeswaran Kothandapani,<sup>a</sup> Jagadeesh Babu Nanubolu<sup>b</sup> and Subramaniapillai Selva Ganesan,<sup>\*a</sup>

### Experimental Section

#### General

All the chemicals were purchased from Sigma Aldrich, Loba chemicals, Merck, Avra synthesis, and SD Fine chemicals. Oleic acid (Pdt No: 61821625001730) was purchased from Merck and was used as such without further purification. All the substrates and reagents were used without further purification. IR spectra were recorded in the FT-IR PerkinElmer instrument. Melting points were recorded in the microscopic melting point meter and were uncorrected. NMR analysis ( $^1\text{H}$  &  $\text{C}^{13}$ ) were determined by Bruker Av-300MHz spectrometer.

**Representative procedure of bis(indolyl)methane synthesis:** A mixture of benzaldehyde (1 mmol, 0.1019 mL), indole (2 mmol, 0.2343 g) and oleic acid (12.5 mol%, 40  $\mu\text{L}$ ) were taken in the 3 ml of distilled water and was stirred at 100 °C for 2 h. After completion of reaction, the reaction mixture was cooled to room temperature and the formed solid were washed with distilled water (3 $\times$ 5 mL) followed by hexane (2 $\times$ 5 mL) for removing oleic acid. The solid mass was further stirred in hexane (10 mL) for 10 minutes and filtered through Whatman filter paper. The product thus obtained was essentially pure.

#### 3-((1*H*-Indol-3-yl)(phenyl)methyl)-1*H*-indole (3a)

Yield: 98%; Appearance: Red solid; mp = 149-151 °C (Ref; 148-152°C)<sup>1</sup>;  $^1\text{H}$  NMR (300 MHz,  $\text{CDCl}_3$ ):  $\delta$  5.88 (s, 1H), 6.63 (s, 2H), 7.00 (t,  $J$  = 7.5 Hz, 2H), 7.14-7.40 (m, 11H), 7.89 (s, 2H);

#### 3-[1*H*-indole-3-yl(4-nitrophenyl)methyl]-1*H*-indole (3b)

Yield: 99%; Appearance: Yellow Solid; mp = 218-220 °C (Ref; 218-220 °C)<sup>2</sup>;  $^1\text{H}$  NMR (300 MHz,  $\text{DMSO}-d_6$ ):  $\delta$  6.03 (s, 1H), 6.85-6.90 (m, 4H), 7.03-7.08 (m, 2H), 7.29 (d,  $J$  = 7.8 Hz, 2H), 7.37 (d,  $J$  = 8.1 Hz, 2H), 7.61 (dd,  $J$  = 8.7 Hz,  $J$  = 1.2 Hz 2H), 8.15 (dd,  $J$  = 8.7 Hz,  $J$  = 2.7 Hz, 2H), 10.94 (s, 2H);

#### 3-[1*H*-indole-3-yl(3-nitrophenyl)methyl]-1*H*-indole (3c)

Yield: 85%; Appearance: Pale Yellow Solid; mp = 263-264 °C (Ref; 264-265 °C)<sup>2</sup>; <sup>1</sup>H NMR (300 MHz, DMSO-d<sub>6</sub>): δ 5.99 (s, 1H), 6.66 (s, 2H), 7.02 (t, *J* = 7.5 Hz, 2H), 7.17-7.25 (m, 3H), 7.34-7.45 (m, 4H), 7.69 (d, *J* = 7.5 Hz, 1H), 7.98 (s, 2H), 8.08 (d, *J* = 8.1 Hz, 1H), 8.21 (s, 1H).

**3-[(4-fluorophenyl)(1*H*-indole-3-yl)]-1*H*-indole (3d)**

Yield: 92%; Appearance: Reddish brown Solid; mp = 77-79 °C (Ref; 76-78 °C)<sup>2</sup>; <sup>1</sup>H NMR (300 MHz, CDCl<sub>3</sub>): δ 5.87 (s, 1H), 6.65 (d, 2H, *J* = 2.1 Hz), 6.65-7.04 (m, 4H), 7.18 (t, *J* = 9 Hz, 2H), 7.26-7.32 (m, 2H), 7.37 (d, 4H, *J* = 8.7 Hz), 7.95 (s, 2H);

**3-[(4-chlorophenyl)(1*H*-indole-3-yl)]-1*H*-indole (3e)**

Yield: 96%; Appearance: Reddish brown Solid; mp = 78-80 °C (Ref; 78-80 °C)<sup>2</sup>; <sup>1</sup>H NMR (300 MHz, CDCl<sub>3</sub>): δ 5.89 (s, 1H), 6.65 (s, 2H), 7.00 (t, *J* = 7.5 Hz, 2H), 7.14-7.40 (m, 10H), 7.90 (s, 2H);

**Representative procedure for the synthesis of 4*H*-chromene derivatives:** A mixture of salicylaldehyde (1 mmol, 0.106 mL), 5,5-dimethyl-1,3-cyclohexanedione (1 mmol, 0.140 g), indole (1 mmol, 0.117 g) and oleic acid (12.5 mol%, 40 µL) were taken in 3 ml of water and was stirred at 100 °C for 2 h. After completion, the reaction mixture was cooled to room temperature and the formed solid were washed with distilled water (3×5 mL) followed by hexane (2×5 mL) for removing oleic acid. The solid was further stirred with hexane (1×10 mL) for 10 minutes and filtered through Whatman filter paper. The white solid thus obtained was essentially pure. Suitable crystals for the single crystal XRD studies were obtained by crystallizing the product in chloroform and ethyl acetate mixture (2:2 v/v).

**9-(1*H*-indol-3-yl)-3,3-dimethyl-2,3,4,9-tetrahydro-1*H*-xanthen-1-one (5a)**

Yield: 98%; Appearance: white Solid; mp = 189-191 °C (Ref; 189-191 °C)<sup>3</sup>; <sup>1</sup>H NMR (300 MHz, CDCl<sub>3</sub>): δ 0.95 (s, 3H), 1.10 (s, 3H), 2.15-2.28 (m, 2H), 2.50-2.64 (m, 2H), 5.31 (s, 1H), 6.94-7.25 (m, 8H), 7.39 (d, *J* = 8.1 Hz, 1H), 8.11 (br s, 1H)

**9-(5-methoxy-1*H*-indol-3-yl)-3,3-dimethyl-2,3,4,9-tetrahydro-1*H*-xanthen-1-one (5b)**

Yield: 86%; Appearance: white Solid; mp = 106-109 °C (Ref; 100-102 °C)<sup>4</sup>; <sup>1</sup>H NMR (300 MHz, CDCl<sub>3</sub>): δ 0.97 (s, 3H), 1.11 (s, 3H), 2.16-2.30 (m, 2H), 2.56 (s, 2H), 3.75 (s, 3H), 5.29 (s, 1H),

6.73 (dd,  $J = 8.7$  Hz,  $J = 2.4$  Hz, 1H), 6.86 (d,  $J = 2.4$  Hz, 1H), 7.00 (td,  $J = 7.2$  Hz,  $J = 1.5$  Hz, 1H), 7.10-7.19 (m, 5H), 7.89 (s, 1H);

**9-(2-hydroxynaphthalen-1-yl)-3,3-dimethyl-2,3,4,9-tetrahydro-1H-xanthen-1-one (5c)**

Yield:73%; Appearance: white Solid; mp = 235-239 °C (Ref; 234–236°C)<sup>5</sup>; <sup>1</sup>H NMR (300 MHz, CDCl<sub>3</sub>): δ 0.94 (s, 3H), 1.08 (s, 3H), 2.10 (d,  $J = 16.2$ Hz, 1H), 2.34 (d,  $J = 16.2$  Hz, 1H), 2.54-2.74 (m, 2H ), 5.75 (s, 1H), 6.61 (t,  $J = 7.8$  Hz, 1H), 6.70 (d,  $J = 8.1$  Hz, 1H), 6.85-6.90 (m,1H), 7.0 (d,  $J = 7.5$ Hz, 1H), 7.38-7.51 (m, 3H), 7.87 (t,  $J = 7.5$ Hz, 2H), 8.32 (d,  $J = 8.4$ Hz, 1H), 9.67 (s, 1H).

**9-(1H-indol-3-yl)-2,3,4,9-tetrahydro-1H-xanthen-1-one (5d)**

Yield:84%; Appearance: white Solid; mp = 217-220°C; <sup>1</sup>H NMR (300 MHz, CDCl<sub>3</sub>): δ 1.88-1.99 (m, 2H), 2.26-2.33 (m, 2H), 2.70-2.77 (m, 2H), 5.21 (s, 1H ), 6.88-6.93 (m, 1H), 6.97-7.05 (m, 2H), 7.13-7.18 (m,3H), 7.29(t,  $J = 7.8$  Hz,2H), 7.47 (d,  $J = 8.1$  Hz, 1H), 10.83 ( s, 1H). <sup>13</sup>C NMR (75 MHz, CDCl<sub>3</sub>, δ ppm); 20.5, 27.6, 29.0, 37.0, 112.1, 113.6, 116.6, 118.7, 119.1, 120.1, 121.4, 123.1, 125.2, 125.7, 126.2, 128.0, 130.1, 136.9, 149.4, 167.0, 197.4. IR (cm<sup>-1</sup>): 3430, 3334, 3061, 2947, 2915, 2843, 1636, 1580, 1484, 1378, 1234, 1178, 993, 623. MS (LC): m/z = 316 (M+1).

**9-(1-methyl-1H-indol-3-yl)-2,3,4,9-tetrahydro-1H-xanthen-1-one (5e)**

Yield:90%; Appearance: white Solid; mp =116-119 °C; <sup>1</sup>H NMR (300 MHz, CDCl<sub>3</sub>): δ 1.88-2.02 (m, 2H), 2.26-2.50 (m, 2H), 2.71-2.77 (m, 2H), 3.67 (s, 3H), 5.20 (s, 1H ), 6.93-7.28 (m, 6H), 7.29-7.32 (m, 2H), 7.58 (d,  $J = 7.8$  Hz, 1H); <sup>13</sup>C NMR (75 MHz, CDCl<sub>3</sub>, δ ppm); 20.1, 27.1, 28.2, 32.2, 36.6, 109.7, 113.2, 116.1, 118.5, 118.6, 118.9, 120.9, 124.7, 125.6, 125.8, 127.0, 127.4, 129.6, 136.7, 148.9, 166.2, 196.2. IR (cm<sup>-1</sup>): 3446, 3117, 3061, 2955, 2915, 2883, 1644, 1580, 1484 , 1370, 1330, 1242, 1178, 1130, 993, 751, 574, 534. MS (LC): m/z = 330 (M+1).

**12-(1H-indol-3-yl)-2,3,4,12-tetrahydro-1H-5-oxatetraphen-1-one(5f)**

Yield:98%; Appearance: white Solid; mp = 235-238 °C; <sup>1</sup>H NMR (300 MHz, CDCl<sub>3</sub>): δ 1.74-1.81 (m, 1H), 1.94-2.0 (m, 1H), 2.23-2.36 (m, 2H), 2.73-2.77 (m, 2H), 5.88 (s, 1H ), 6.83 (t,  $J = 6.9$ Hz, 1H), 6.93 (t,  $J = 7.2$  Hz, 1H), 7.21-7.48 (m, 6H), 7.87(d,  $J = 8.7$  Hz, 2H), 8.17 (d,  $J =$

8.4Hz, 1H), 10.85 (s, 1H);  $^{13}\text{C}$  NMR (75 MHz,  $\text{CDCl}_3$ ,  $\delta$  ppm); 20.0, 25.8, 26.8, 27.1, 36.5, 38.6, 111.5, 113.8, 116.9, 117.3, 117.9, 118.2, 118.5, 120.5, 122.7, 123.3, 124.1, 124.7, 125.3, 126.8, 128.4, 128.6, 131.0, 136.1, 147.0, 165.1, 196.3; IR ( $\text{cm}^{-1}$ ): 3462, 3342, 3061, 2915, 1644, 1370, 1226, 1186, 993, 945, 807, 751; MS (LC):  $m/z$  = 366 (M+1).

**12-(1*H*-indol-3-yl)-3,3-dimethyl-2,3,4,12-tetrahydro-1*H*-5-oxatetraphen-1-one (5g)**

Yield:88; Appearance: white Solid; mp = 234-237°C;  $^1\text{H}$  NMR (300 MHz,  $\text{CDCl}_3$ ):  $\delta$  0.80 (s, 3H), 1.05 (s, 3H), 2.05-2.33 (m, 2H), 2.57-2.73 (m, 2H), 5.86 (s, 1H), 6.83 (t,  $J$  = 7.2 Hz, 1H), 6.92 (t,  $J$  = 7.5 Hz, 1H), 7.21(d,  $J$  = 7.8 Hz, 1H), 7.33-7.47 (m, 5H), 7.85 (d,  $J$  = 7.1 Hz, 2H), 8.22 (d,  $J$  = 7.8 Hz, 1H), 10.85 (s, 1H);  $^{13}\text{C}$  NMR (75 MHz,  $\text{CDCl}_3$ ,  $\delta$  ppm); 25.9, 26.4, 28.8, 31.7, 50.2, 111.5, 112.5, 117.0, 117.2, 117.7, 118.2, 118.4, 120.5, 123.4, 124.1, 124.7, 125.3, 126.7, 128.4, 128.6, 131.0, 136.1, 146.9, 163.2, 196.1; IR ( $\text{cm}^{-1}$ ): 3440, 3241, 2958, 2914, 1639, 1595, 1373, 1223, 1099, 815, 745, 622; MS (LC):  $m/z$  = 394 (M+1).

**Procedure for the recyclability of oleic acid catalyst on 4*H*-chromene (5d) synthesis:** A mixture of salicylaldehyde (1 mmol, 0.106 mL), 1,3-cyclohexanedione (1 mmol, 0.112 g), indole (1 mmol, 0.117 g) and oleic acid (12.5 mol%, 40  $\mu\text{L}$ ) were taken in 3 ml of water and was stirred at 100 °C for 2 h. After completion, the reaction mixture was decanted to remove aqueous layer and the residue was extracted twice with hexane:ethyl acetate mixture (4.5:0.5 v/v) to remove trace oleic acid catalyst embedded with product **5d**. The organic solvents were evaporated and the residue was mixed with the previously isolated aqueous layer. The reaction was repeated by freshly adding substrates to the mixture of recovered oleic acid on water.

| Number of cycles | 5d Yield (%) |
|------------------|--------------|
| 1                | 84           |
| 2                | 84           |
| 3                | 83           |
| 4                | 81           |

**Representative procedure of spirooxindoles synthesis :** A mixture of isatin (1 mmol, 0.147 g), 5,5-dimethyl-1,3-cyclohexanedione (1mmol, 0.140 g), malononitrile (1 mmol, 63  $\mu\text{L}$ ) and oleic acid (12.5 mol%, 40  $\mu\text{L}$ ) were taken in the 3 ml of ethanol and was stirred at room temperature

for appropriate time. After completion, the reaction mixture was quenched with water and the formed solids were filtered through Whatman filter paper and were washed with distilled water (3×5 mL) followed hexane (2×5mL) for removing oleic acid. The white solid thus obtained was essentially pure.

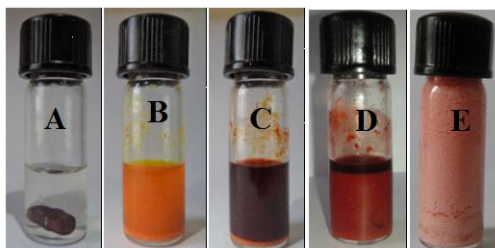

**Sequence (A) Oleic acid in ethanol (B) After addition of isatin and barbituric acid (C) After addition of malononitrile (D) After completion the reaction (E) After quenching with water**

**7'-amino-2,2',4'-trioxo-1,1',2,2',3',4'-hexahydrospiro[indole-3,5'-pyrano[2,3-d]pyrimidine]-6'-carbonitrile (6a)**

Yield: 91% Appearance: white Solid; mp = 273-275 °C (Ref; 277-278 °C)<sup>6</sup>; <sup>1</sup>H NMR (300 MHz, DMSO-d<sub>6</sub>); δ 6.79 (d, *J* = 7.5 Hz, 1H), 6.91 (t, *J* = 7.5 Hz, 1H), 7.12-7.19 (m, 2H), 7.38 (s, 2H), 10.49 (s, 1H), 11.13 (s, 1H), 12.32 (br s, 1H);

**2-amino-2',5-dioxo-1',2',5,6,7,8-hexahydrospiro[chromene-4,3'-indole]-3-carbonitrile (6b)**

Yield: 90% Appearance: white Solid; mp = 277-279 °C (Ref; 278-280 °C)<sup>7</sup>; <sup>1</sup>H NMR (300 MHz, DMSO-d<sub>6</sub>); δ 1.92 (t, *J* = 6.3 Hz, 2H), 2.22-2.23 (m, 2H), 2.66 (t, *J* = 6.0 Hz, 2H), 6.78 (d, *J* = 7.8 Hz, 1H), 6.88 (t, *J* = 7.5 Hz, 1H), 7.00 (d, *J* = 7.2 Hz, 1H), 7.14 (t, *J* = 7.8 Hz, 1H), 7.23 (s, 2H), 10.40 (s, 1H);

**2-amino-7,7-dimethyl-2',5-dioxo-1',2',5,6,7,8-hexahydrospiro[chromene-4,3'-indole]-3-carbonitrile (6c)**

Yield: 97% Appearance: white Solid; mp = 267-270 °C (Ref; 268-270 °C)<sup>8</sup>; <sup>1</sup>H NMR (300 MHz, DMSO-d<sub>6</sub>); δ 0.99 (s, 3H), 1.03 (s, 3H), 2.09 (d, *J* = 15.9 Hz, 1H), 2.18 (d, *J* = 15.9 Hz, 1H), 2.53 (s, 2H), 6.79 (d, *J* = 7.8 Hz, 1H), 6.89 (t, *J* = 7.5 Hz, 1H), 6.98 (d, *J* = 7.2 Hz, 1H), 7.14 (t, *J* = 7.5 Hz, 1H), 7.24 (s, 2H), 10.41 (s, 1H).

**7'-amino-2,4'-dioxo-2'-sulfanylidene-1,1',2,2',3',4'-hexahydrospiro[indole-3,5'-pyrano[2,3-d]pyrimidine]-6'-carbonitrile (6d)**

Yield: 91% Appearance: white Solid; mp = 239-241 °C (Ref; 238-242 °C)<sup>9</sup>; <sup>1</sup>H NMR (300 MHz, DMSO-d<sub>6</sub>); δ 6.80 (d, *J* = 7.5 Hz, 1H), 6.92 (t, *J* = 7.5 Hz, 1H), 7.18 (t, *J* = 7.5 Hz, 2H), 7.43 (s, 2H), 10.55 (s, 1H), 12.53 (s, 1H);

**ethyl 7'-amino-2,2',4'-trioxo-1,1',2,2',3',4'-hexahydrospiro[indole-3,5'-pyrano[2,3-d]pyrimidine]-6'-carboxylate (6e)**

Yield: 73% Appearance: white Solid; mp = 189-190 °C (Ref; 189-190 °C)<sup>6</sup>; <sup>1</sup>H NMR (300 MHz, DMSO-d<sub>6</sub>); δ 0.78 (t, *J* = 7.2 Hz, 3H), 3.71 (q, *J* = 3.3 Hz, 2H), 6.68 (d, *J* = 7.5 Hz, 1H) 6.78 (t, *J* = 7.5 Hz, 1H), 6.95 (d, *J* = 7.2 Hz, 1H), 7.07 (t, *J* = 7.5 Hz, 1H), 7.95 (s, 2H), 10.24 (s, 1H), 10.97 (s, 1H), 12.16 (br s, 1H);

**7'-amino-1',3'-dimethyl-2,2',4'-trioxo-1,1',2,2',3',4'-hexahydrospiro[indole-3,5'-pyrano[2,3-d]pyrimidine]-6'-carbonitrile (6f)**

Yield: 89%; Appearance: white Solid; mp = 226-227 °C (Ref; 228-229 °C)<sup>6</sup>; <sup>1</sup>H NMR (300 MHz, DMSO-d<sub>6</sub>) δ 3.02 (s, 3H), 3.38 (s, 3H merged with DMSO-water peak), 6.80 (d, *J* = 7.5 Hz, 1H), 6.91 (t, *J* = 7.2 Hz, 1H), 7.11-7.19 (m, 2H), 7.57 (s, 2H), 10.51 (s, 1H);

**Procedure of spiro[indoline-3,4'-pyrano[2,3-c]pyrazole] synthesis:** A mixture of hydrazine (1.5 mmol, 47 μL), ethylacetoacetate, (1mmol, 128 μL), malononitrile (1 mmol, 63 μL), isatin (1 mmol, 0.147 g), oleic acid (12.5 mol%, 40 μL) were taken in the 3 ml of ethanol and it was stirred at 80 °C for 1 h. After completion, the reaction was quenched with water and the formed solids were filtered through Whatman filter paper and were washed with distilled water (3×5 mL) and hexane (2×5mL) for removing oleic acid. The Light red powder thus obtained was essentially pure.

**6'-amino-3'-methyl-2-oxo-1,2,5',6'-tetrahydro-1'H-spiro[indole-3,4'-pyrano[2,3-c]pyrazole]-5'-carbonitrile (7)**

Yield: 94%; Appearance: Light red powder; mp = 286-289 °C (Ref; 285-286 °C)<sup>10</sup>; <sup>1</sup>H NMR (300 MHz, DMSO-d<sub>6</sub>) δ 1.53 (s, 3H), 6.80 (d, *J* = 7.5 Hz, 1H), 6.91 (d, *J* = 7.8 Hz, 1H), 6.97-7.05 (m, 2H), 7.26 (s, 3H), 10.61 (s, 1H); 12.30 (s, 1H).

## References

1. H. M. Meshram and N. N. Rao, *Indian J. Chem.*, 2013, **52B**, 814–817.
2. S. Mishra and R. Ghosh, *Indian J. Chem.*, 2011, **50B**, 1630–1636.
3. N. C. Ganguly, S. Roy, P. Mondal and R. Saha, *Tetrahedron Lett.*, 2012, **53**, 7067–7071.
4. M. Li and Y. Gu, *Adv. Synth. Catal*, 2012, **354**, 2484–2494.
5. P. P. Ghosh and A. R. Das, *J. Org. Chem.*, 2013, **78**, 6170–6181.
6. D. S. Raghuvanshi and K. N. Singh, *J. Heterocycl. Chem.*, 2010, **47**, 1323–1327.
7. B. M. Rao, G. N. Reddy, T. V. Reddy, B. L. A. P. Devi, R. B. N. Prasad, J. S. Yadav and B. V. S. Reddy, *Tetrahedron Lett.*, 2013, **54**, 2466–2471.
8. M. Dabiri, M. Bahramnejad and M. Baghbanzadeh, *Tetrahedron*, 2009, **65**, 9443–9447.
9. S.-L. Zhu, S.-J. Ji and Y. Zhang, *Tetrahedron*, 2007, **63**, 9365–9372.
10. Y. Zou, Y. Hu, H. Liu and D. Shi, *ACS Comb. Sci.*, 2012, **14**, 38–43.

7.880  
7.398  
7.372  
7.355  
7.329  
7.296  
7.273  
7.247  
7.224  
7.201  
7.186  
7.162  
7.136  
7.022  
6.997  
6.972  
6.633  
5.880

1.695

0.000

39

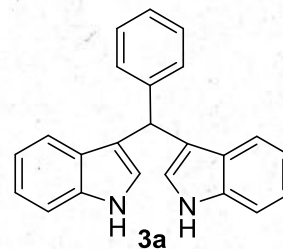

Current Data Parameters  
NAME 1073B  
EXPNO 1  
PROCNO 1

F2 - Acquisition Parameters  
Date\_ 20141024  
Time 13.59  
INSTRUM spect  
PROBHD 5 mm BBO BB-1H  
PULPROG zg30  
TD 65536  
SOLVENT CDCl3  
NS 16  
DS 2  
SWH 6188.119 Hz  
FIDRES 0.094423 Hz  
AQ 5.2953587 sec  
RG 228  
DW 80.800 usec  
DE 6.00 usec  
TE 300.0 K  
D1 1.00000000 sec  
TD0 1

----- CHANNEL f1 -----  
NUC1 1H  
P1 8.60 usec  
PL1 -2.00 dB  
SFO1 300.1318534 MHz

F2 - Processing parameters  
SI 32768  
SF 300.1300100 MHz  
WDW EM  
SSB 0  
LB 0.30 Hz  
GB 0  
PC 1.00

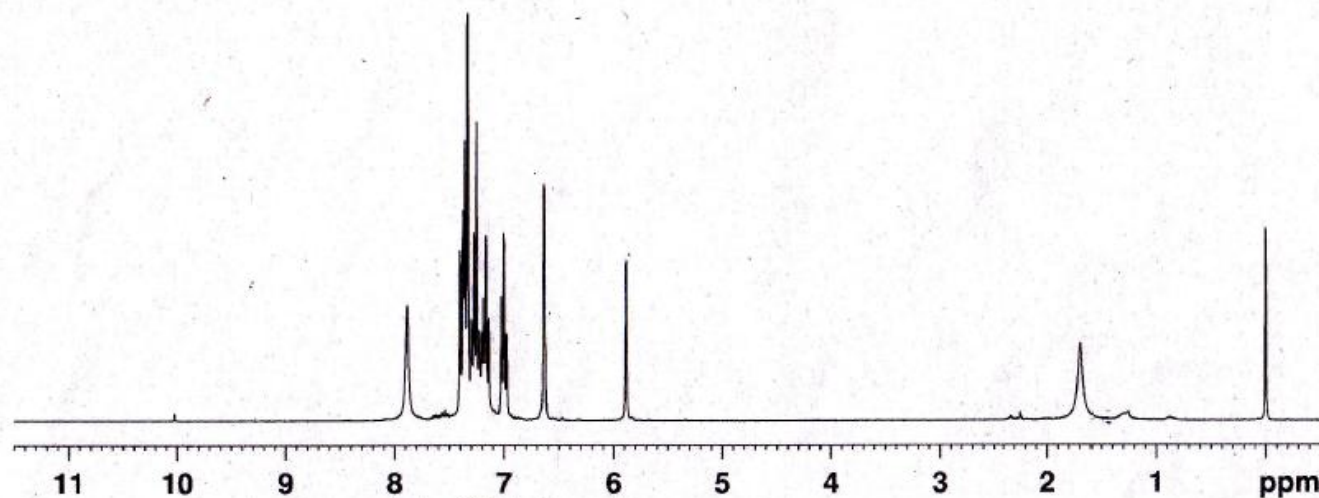

1.00  
0.47  
1.24  
1.18  
0.31  
0.53  
0.27  
0.18  
0.35  
0.51  
0.28  
1.05  
0.94  
0.48

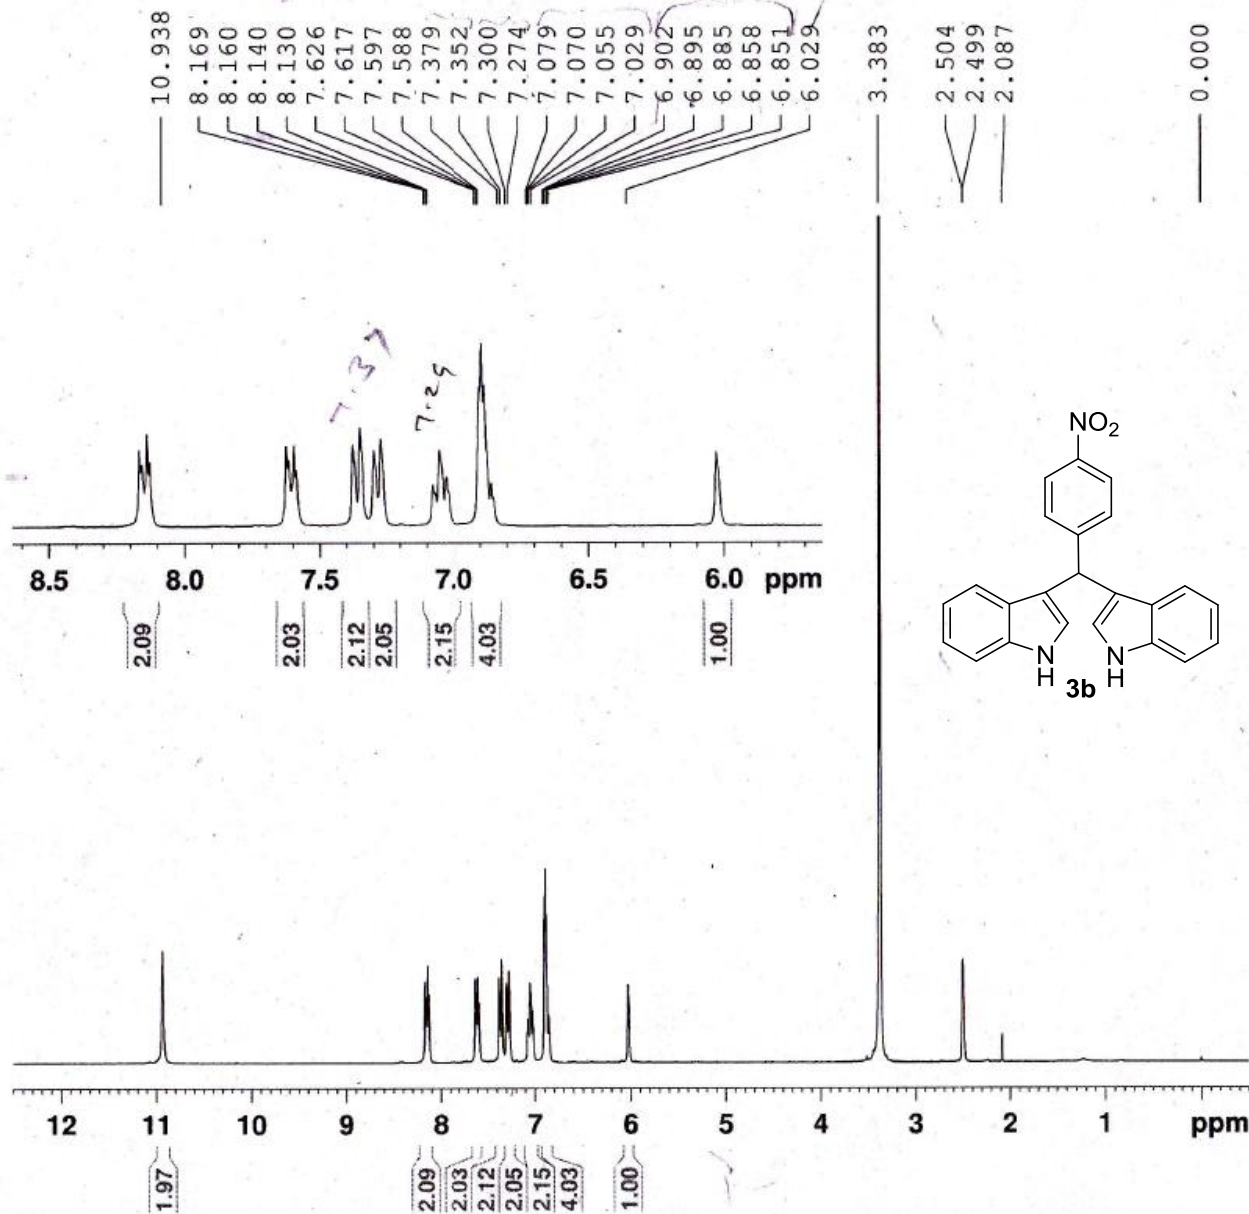

Current Data Parameters  
 NAME 1065F  
 EXPNO 1  
 PROCNO 1

F2 - Acquisition Parameters  
 Date\_ 20141018  
 Time 9.16  
 INSTRUM spect  
 PROBHD 5 mm BBO BB-1H  
 PULPROG zg30  
 TD 65536  
 SOLVENT DMSO  
 NS 16  
 DS 2  
 SWH 6188.119 Hz  
 FIDRES 0.094423 Hz  
 AQ 5.2953587 sec  
 RG 181  
 DW 80.800 usec  
 DE 6.00 usec  
 TE 300.0 K  
 D1 1.00000000 sec  
 TD0 1

----- CHANNEL f1 -----  
 NUC1 1H  
 P1 8.60 usec  
 PL1 -2.00 dB  
 SFO1 300.1318534 MHz

F2 - Processing parameters  
 SI 32768  
 SF 300.1300005 MHz  
 WDW EM  
 SSB 0  
 LB 0.30 Hz  
 GB 0  
 PC 1.00

8.721  
8.506  
8.478  
8.206  
8.092  
8.065  
7.989  
7.701  
7.676  
7.459  
7.433  
7.406  
7.388  
7.361  
7.336  
7.251  
7.219  
7.194  
7.168  
7.047  
7.022  
6.997  
6.658  
5.990

2.334  
2.253  
2.047  
1.588  
1.310  
1.282  
1.258  
1.234  
0.000

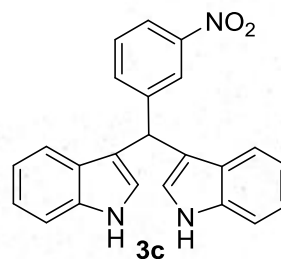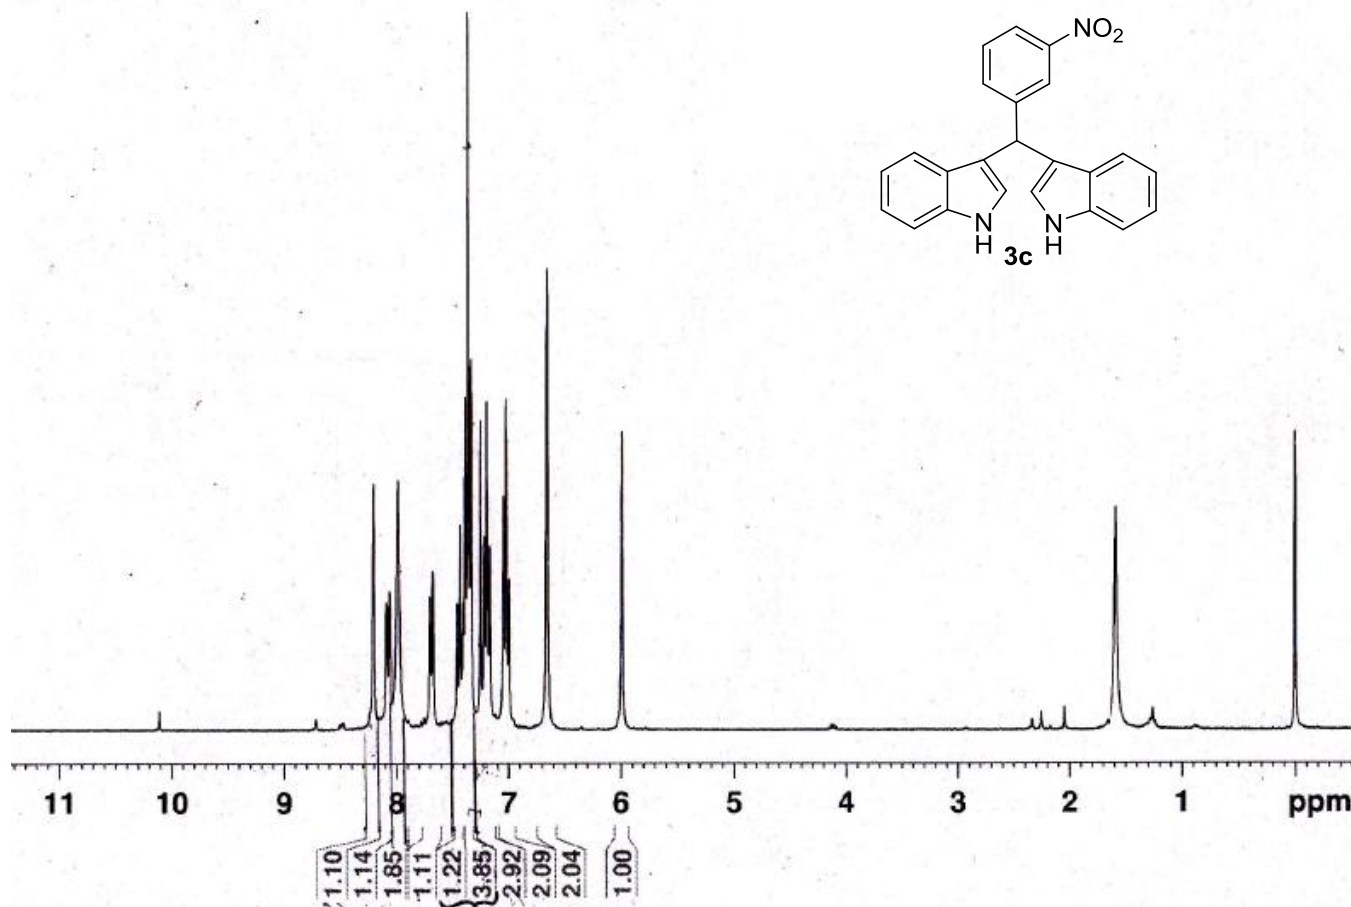

Current Data Parameters  
NAME 10651  
EXPNO 1  
PROCNO 1

F2 - Acquisition Parameters  
Date\_ 20141018  
Time 9.47  
INSTRUM spect  
PROBHD 5 mm BBO BB-1H  
PULPROG zg30  
TD 65536  
SOLVENT CDCl3  
NS 16  
DS 2  
SWH 6188.119 Hz  
FIDRES 0.094423 Hz  
AQ 5.2953587 sec  
RG 228  
DW 80.800 usec  
DE 6.00 usec  
TE 300.0 K  
D1 1.00000000 sec  
TD0 1

===== CHANNEL f1 =====  
NUC1 1H  
P1 8.60 usec  
PL1 -2.00 dB  
SFO1 300.1318534 MHz

F2 - Processing parameters  
SI 32768  
SF 300.1300087 MHz  
WDW EM  
SSB 0  
LB 0.30 Hz  
GB 0  
PC 1.00

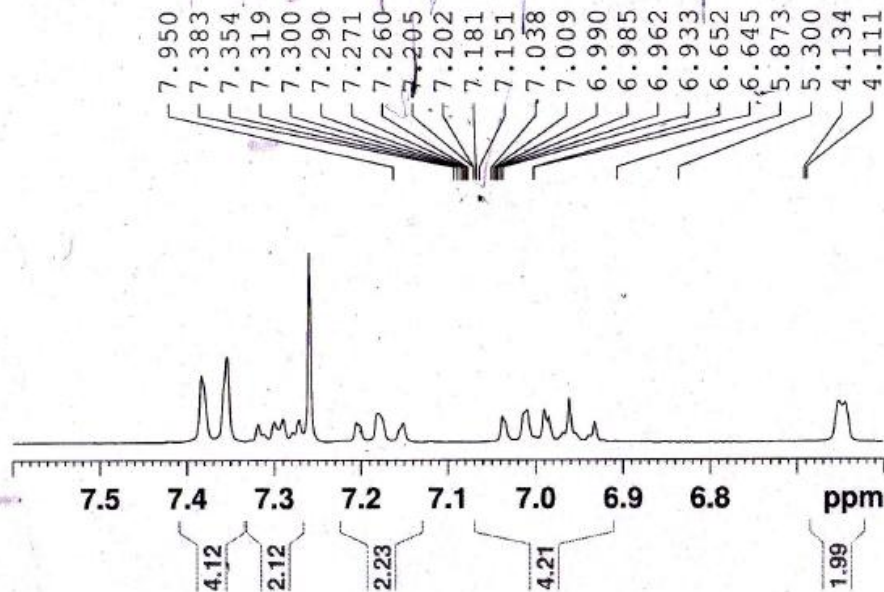

2.049  
1.580  
1.294  
1.254  
0.000

Current Data Parameters  
NAME 1066E  
EXPNO 1  
PROCNO 1

F2 - Acquisition Parameters  
Date\_ 20141025  
Time 12.43  
INSTRUM spect  
PROBHD 5 mm BBO BB-1H  
PULPROG zg30  
TD 65536  
SOLVENT CDCl3  
NS 16  
DS 2  
SWH 6188.119 Hz  
FIDRES 0.094423 Hz  
AQ 5.2953587 sec  
RG 322  
DW 80.800 usec  
DE 6.00 usec  
TE 300.0 K  
D1 1.00000000 sec  
TD0 1

===== CHANNEL f1 =====  
NUC1 1H  
P1 8.60 usec  
PL1 -2.00 dB  
SFO1 300.1318534 MHz

F2 - Processing parameters  
SI 32768  
SF 300.1300064 MHz  
WDW EM  
SSB 0  
LB 0.30 Hz  
GB 0  
PC 1.00

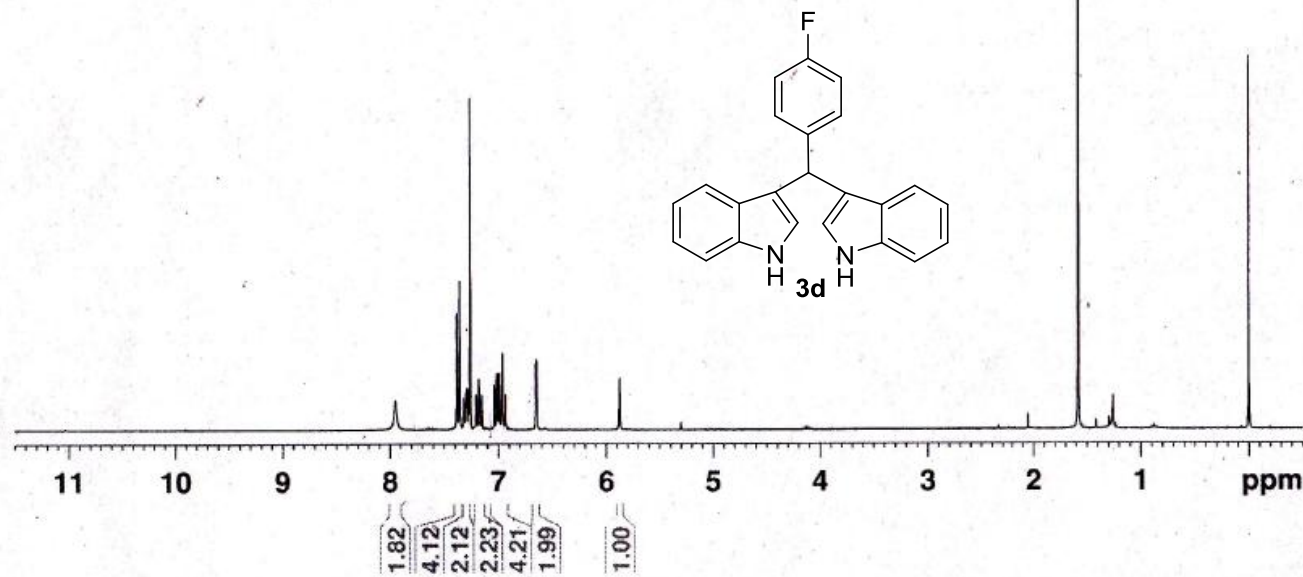

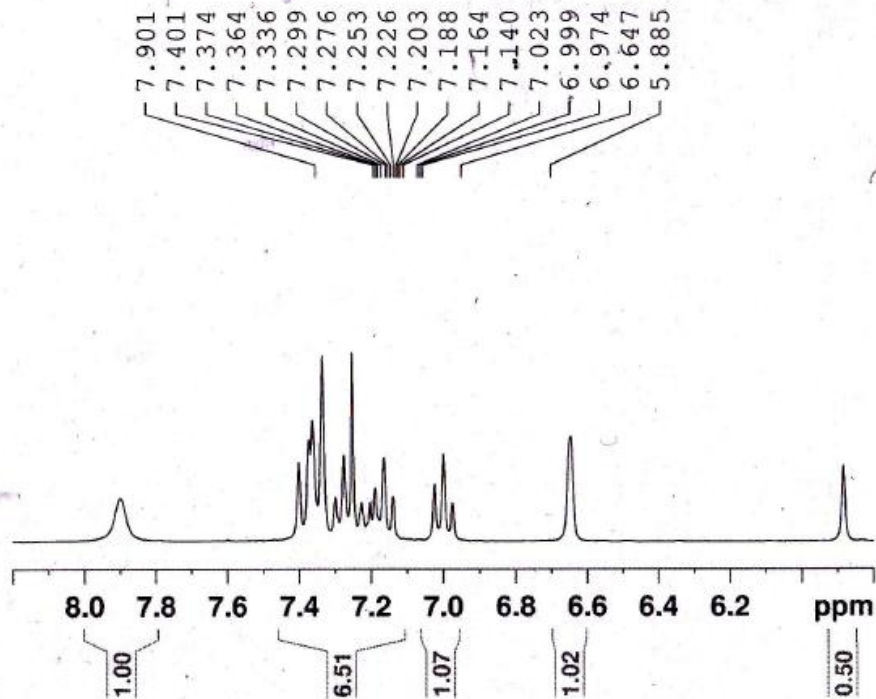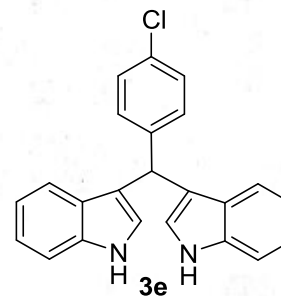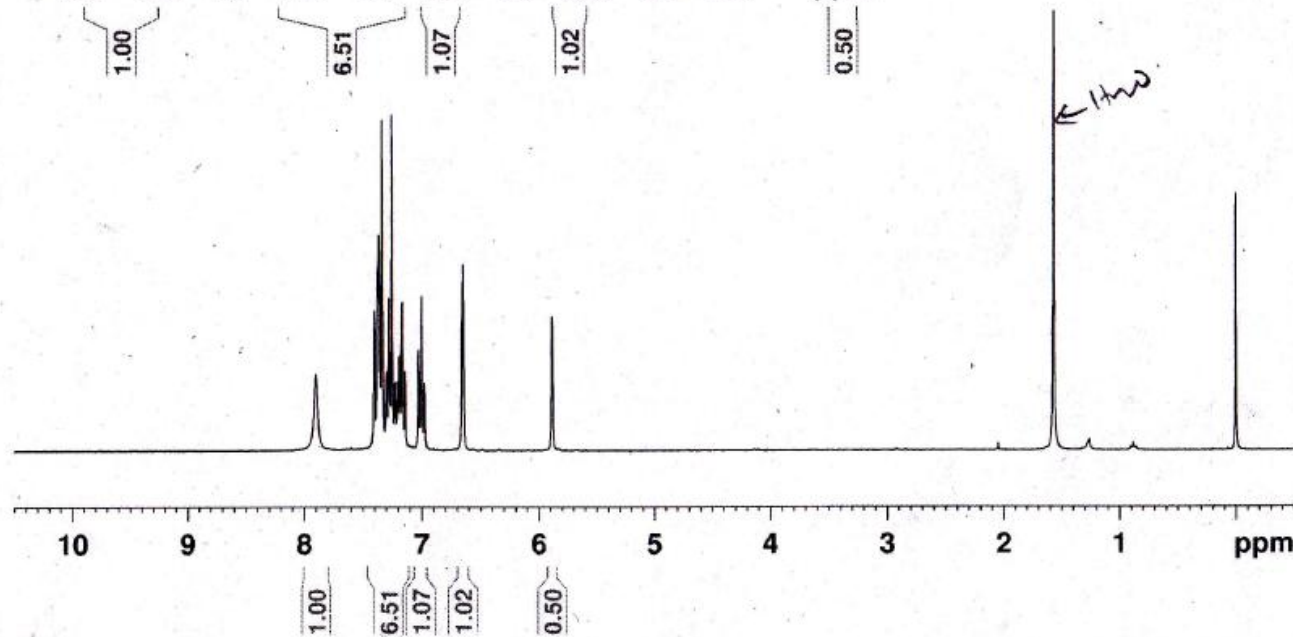

Current Data Parameters  
NAME 1065E  
EXPNO 1  
PROCNO 1

F2 - Acquisition Parameters  
Date\_ 20141016  
Time 17.50  
INSTRUM spect  
PROBHD 5 mm BBO BB-1H  
PULPROG zg30  
TD 65536  
SOLVENT CDCl3  
NS 16  
DS 2  
SWH 6188.119 Hz  
FIDRES 0.094423 Hz  
AQ 5.2953587 sec  
RG 322  
DW 80.800 usec  
DE 6.00 usec  
TE 300.0 K  
D1 1.00000000 sec  
TD0 1

===== CHANNEL f1 =====  
NUC1 1H  
P1 8.60 usec  
PL1 -2.00 dB  
SFO1 300.1318534 MHz

F2 - Processing parameters  
SI 32768  
SF 300.1300083 MHz  
WDW EM  
SSB 0  
LB 0.30 Hz  
GB 0  
PC 1.00

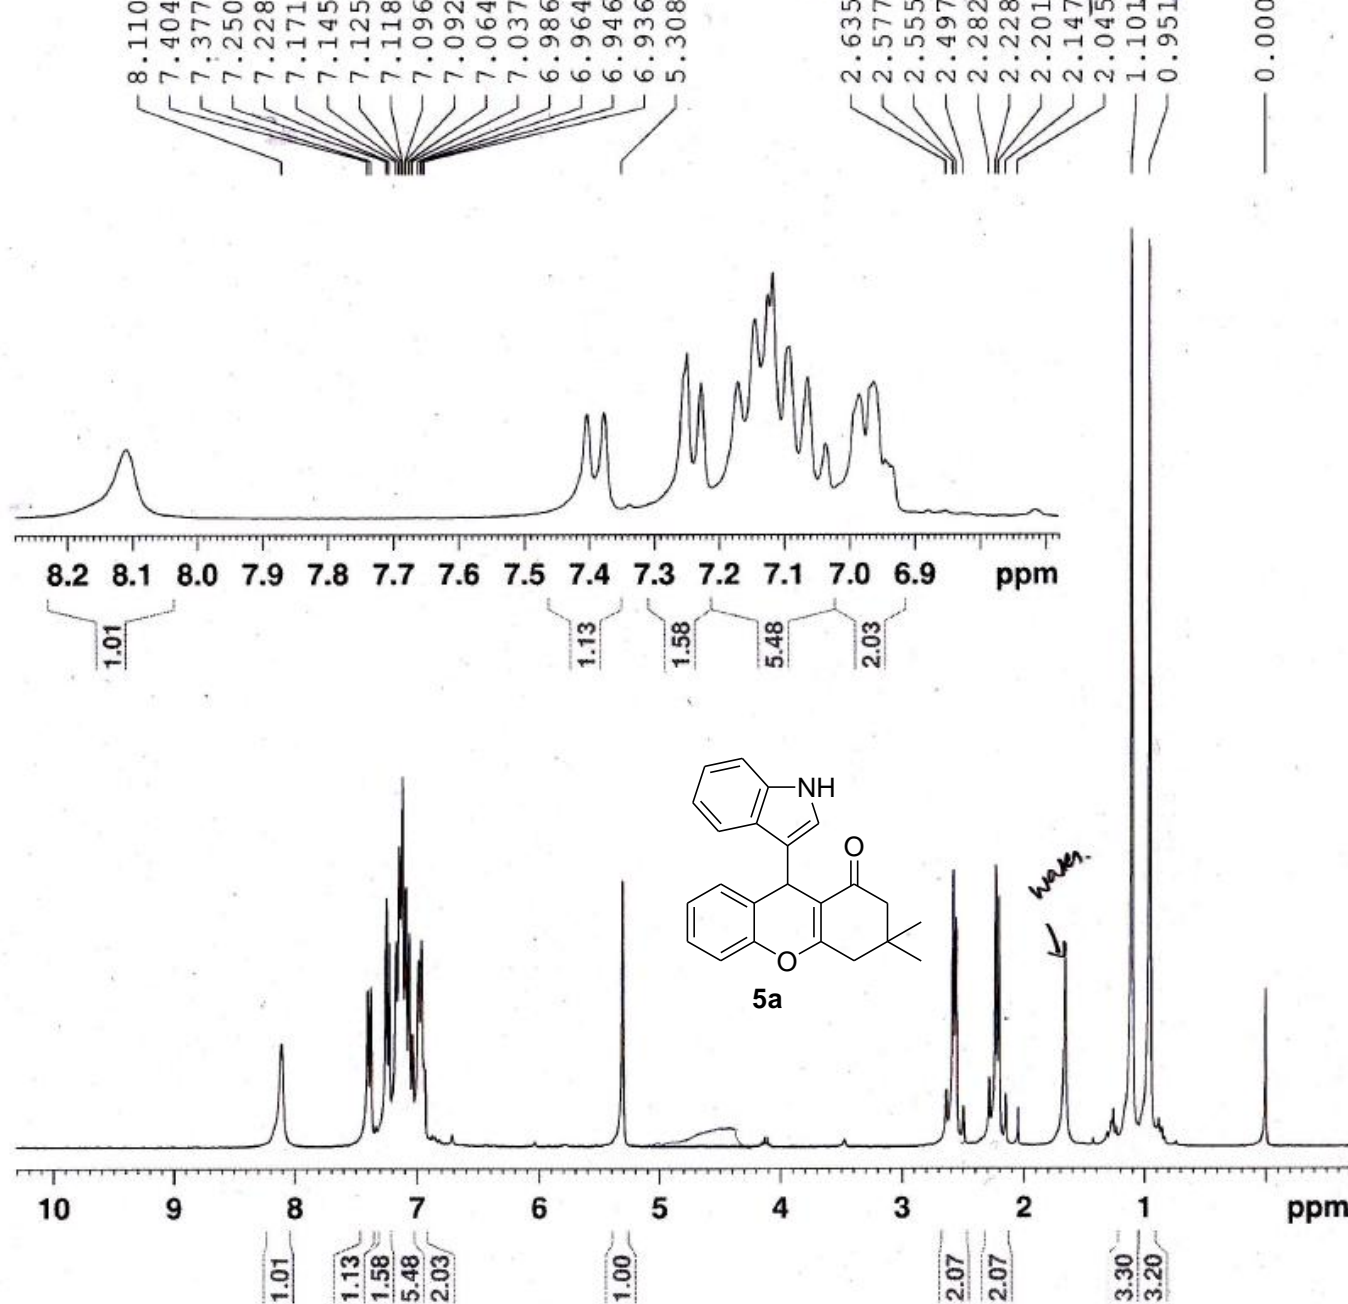

Current Data Parameters  
 NAME 1049D  
 EXPNO 1  
 PROCNO 1

F2 - Acquisition Parameters

Date\_ 20141014  
 Time 14.36  
 INSTRUM spect  
 PROBHD 5 mm BBO BB-1H  
 PULPROG zg30  
 TD 65536  
 SOLVENT CDCl3  
 NS 16  
 DS 2  
 SWH 6188.119 Hz  
 FIDRES 0.094423 Hz  
 AQ 5.2953587 sec  
 RG 161  
 DW 80.800 usec  
 DE 6.00 usec  
 TE 300.0 K  
 D1 1.00000000 sec  
 TD0 1

----- CHANNEL f1 -----

NUC1 1H  
 P1 8.60 usec  
 PL1 -2.00 dB  
 SFO1 300.1318534 MHz

F2 - Processing parameters

SI 32768  
 SF 300.1300091 MHz  
 WDW EM  
 SSB 0  
 LB 0.30 Hz  
 GB 0  
 PC 1.00

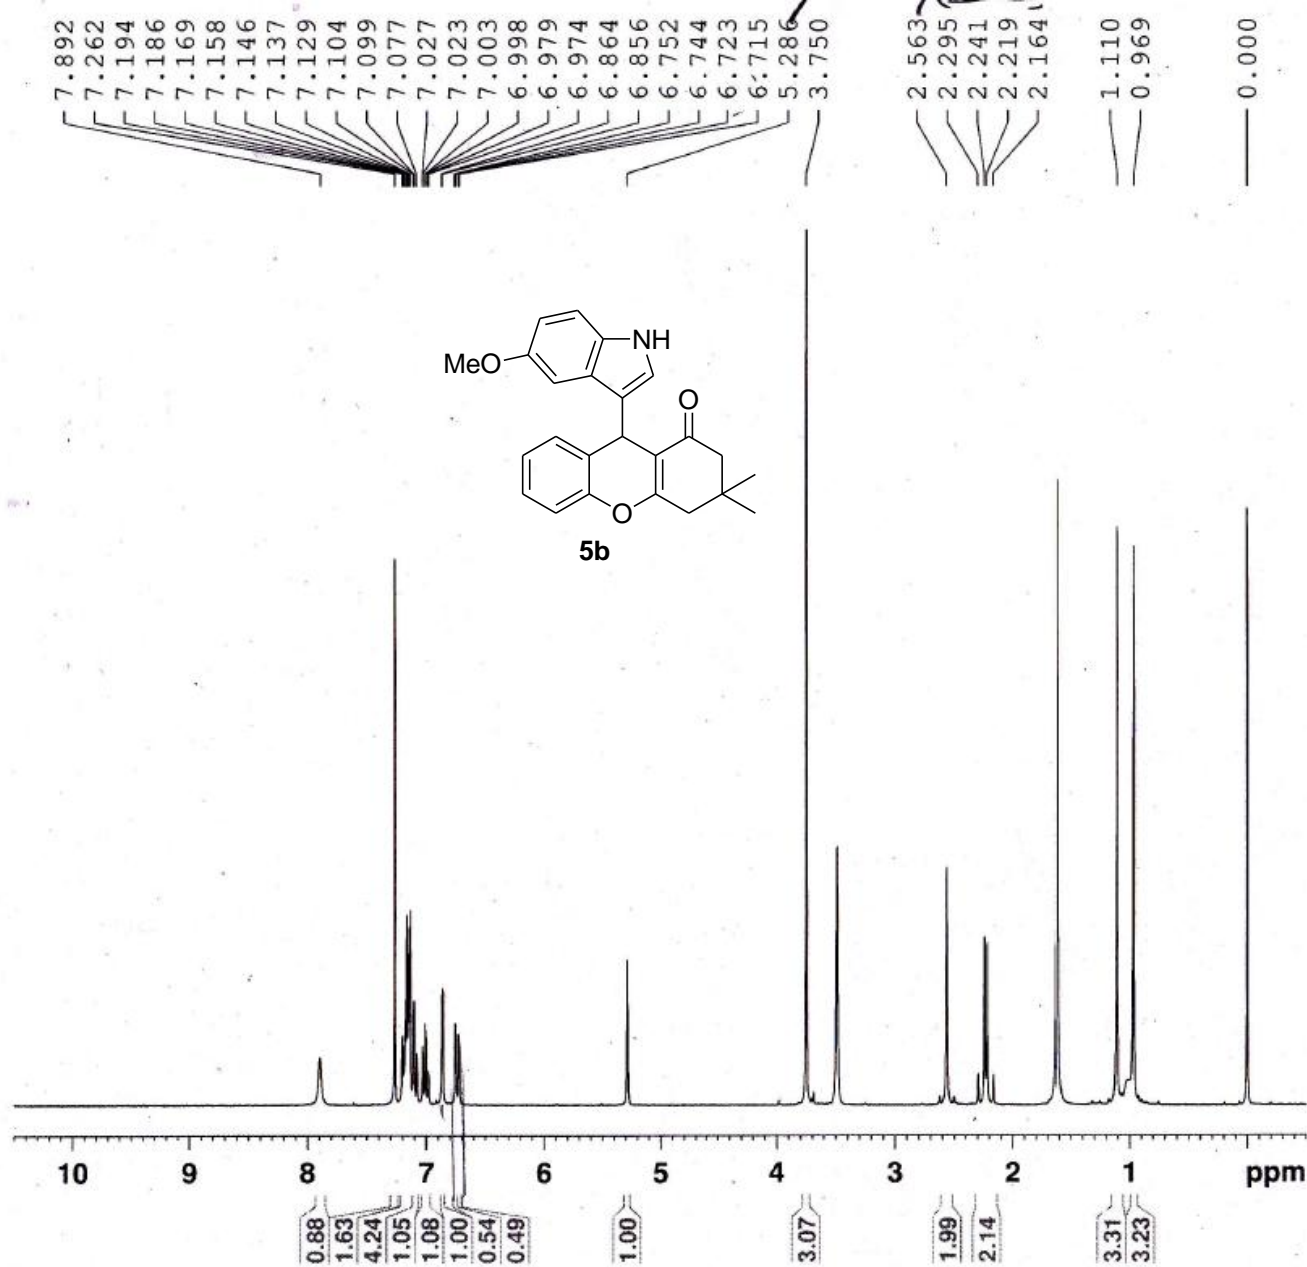

Current Data Parameters  
 NAME 1049F  
 EXPNO 1  
 PROCNO 1

F2 - Acquisition Parameters  
 Date\_ 20141014  
 Time 14.43  
 INSTRUM spect  
 PROBHD 5 mm BBO BB-1H  
 PULPROG zg30  
 TD 65536  
 SOLVENT CDCl3  
 NS 16  
 DS 2  
 SWH 6188.119 Hz  
 FIDRES 0.094423 Hz  
 AQ 5.2953587 sec  
 RG 287  
 DW 80.800 usec  
 DE 6.00 usec  
 TE 300.0 K  
 D1 1.00000000 sec  
 TD0 1

----- CHANNEL f1 -----  
 NUC1 1H  
 P1 8.60 usec  
 PL1 -2.00 dB  
 SFO1 300.1318534 MHz

F2 - Processing parameters  
 SI 32768  
 SF 300.1300056 MHz  
 WDW EM  
 SSB 0  
 LB 0.30 Hz  
 GB 0  
 PC 1.00

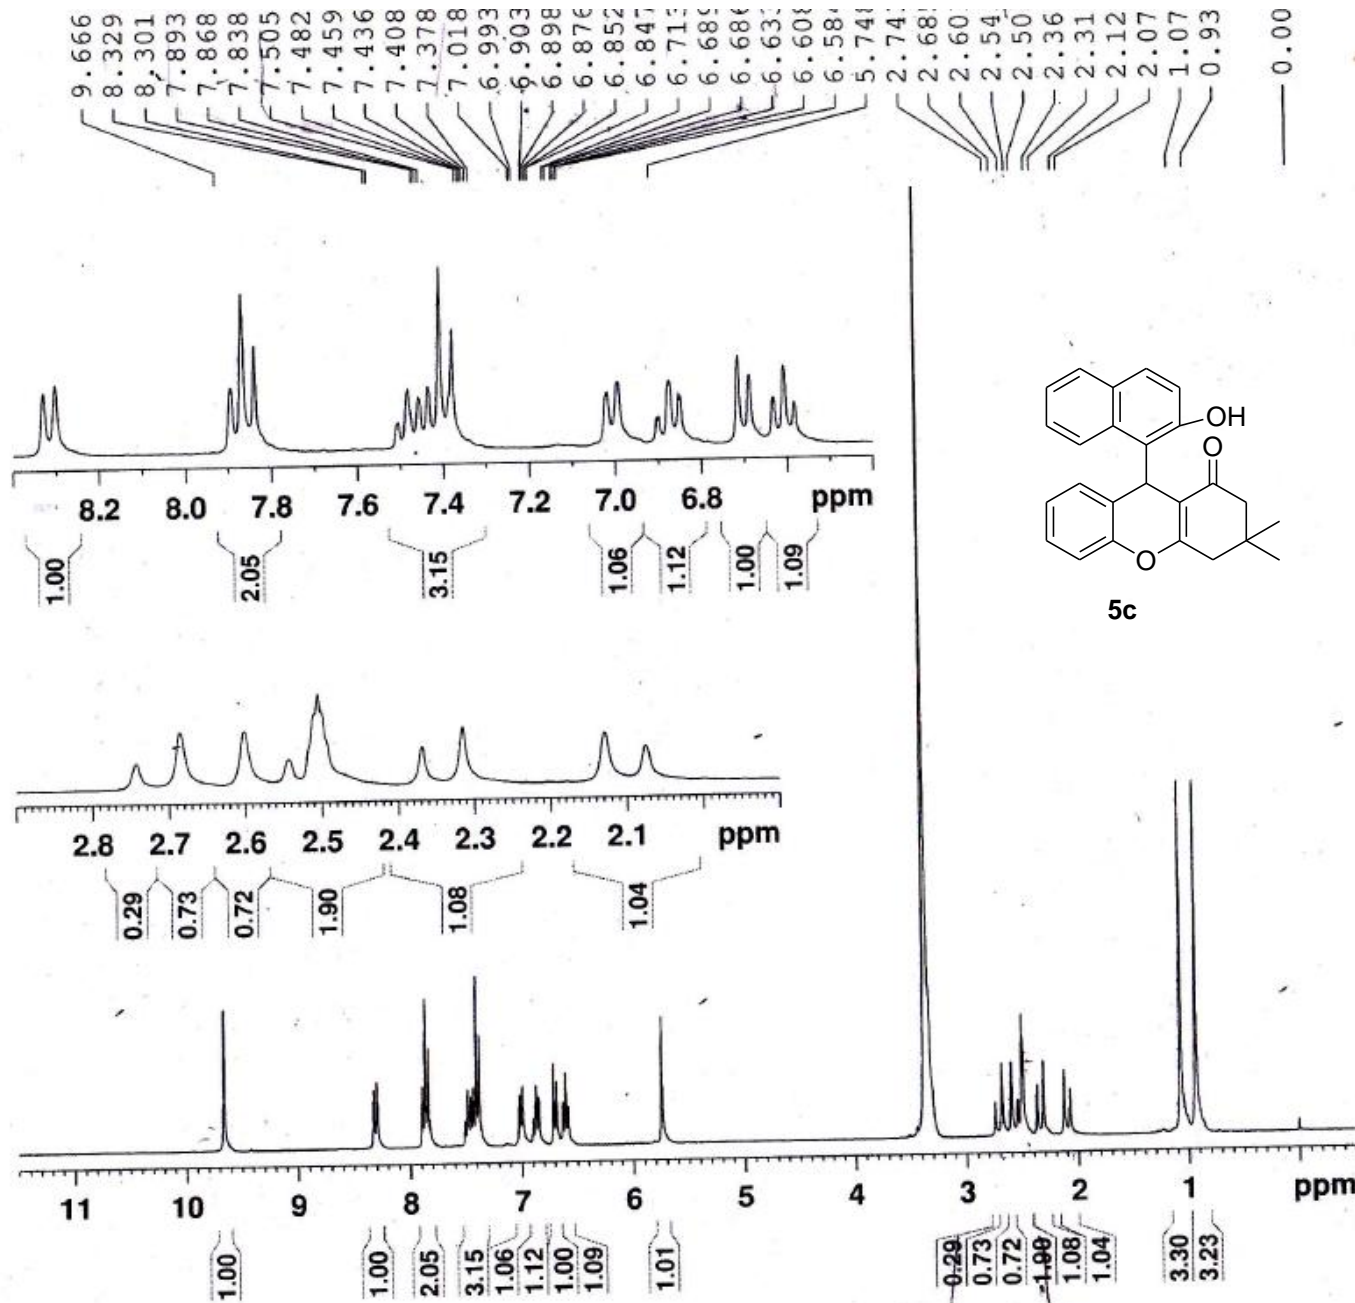

Current Data Parameters  
 NAME 1059A  
 EXPNO 1  
 PROCNO 1

F2 - Acquisition Parameters  
 Date\_ 20141015  
 Time 15.16  
 INSTRUM spect  
 PROBHD 5 mm BBO BB-1H  
 PULPROG zg30  
 TD 65536  
 SOLVENT DMSO  
 NS 16  
 DS 2  
 SWH 6188.119 Hz  
 FIDRES 0.094423 Hz  
 AQ 5.2953587 sec  
 RG 181  
 DW 80.800 usec  
 DE 6.00 usec  
 TE 300.0 K  
 D1 1.00000000 sec  
 TD0 1

===== CHANNEL f1 =====  
 NUC1 1H  
 P1 8.60 usec  
 PL1 -2.00 dB  
 SFO1 300.1318534 MHz

F2 - Processing parameters  
 SI 32768  
 SF 300.1299998 MHz  
 WDW EM  
 SSB 0  
 LB 0.30 Hz  
 GB 0  
 PC 1.00

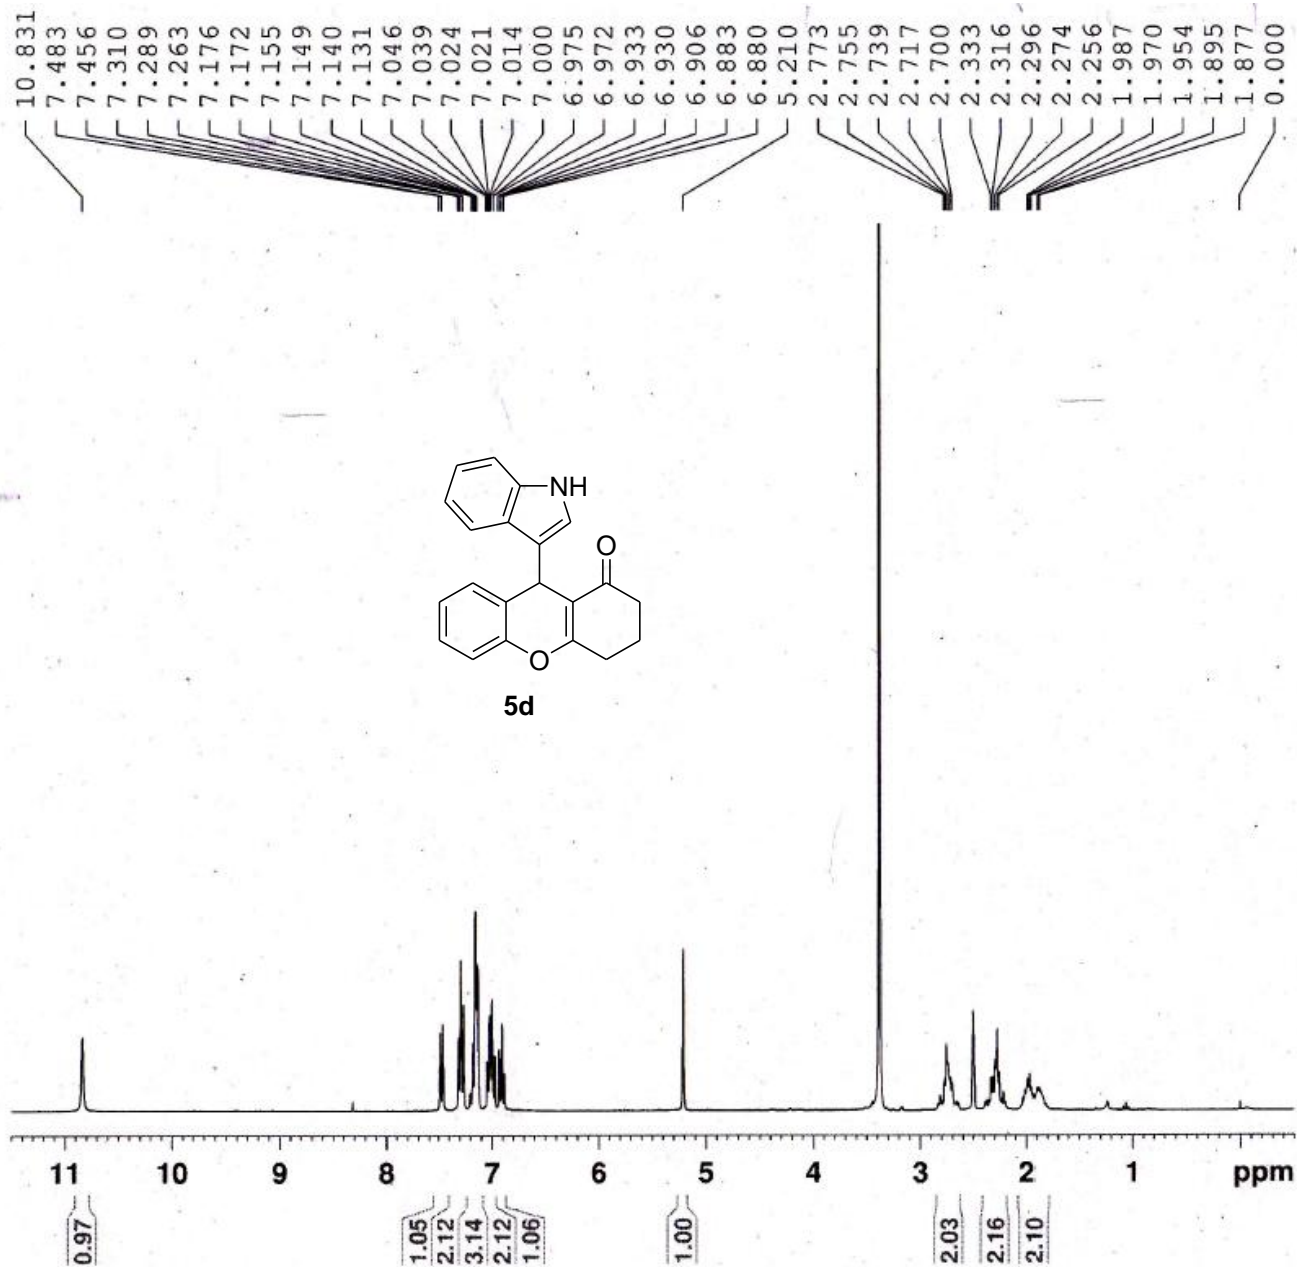

Current Data Parameters

NAME 1065C  
EXPNO 1  
PROCNO 1

F2 - Acquisition Parameters

Date\_ 20141016  
Time 17.05  
INSTRUM spect  
PROBHD 5 mm BBO BB-1H  
PULPROG zg30  
TD 65536  
SOLVENT DMSO  
NS 16  
DS 2  
SWH 6188.119 Hz  
FIDRES 0.094423 Hz  
AQ 5.2953587 sec  
RG 161  
DW 80.800 usec  
DE 6.00 usec  
TE 300.0 K  
D1 1.00000000 sec  
TD0 1

===== CHANNEL f1 =====

NUC1 1H  
P1 8.60 usec  
PL1 -2.00 dB  
SFO1 300.1318534 MHz

F2 - Processing parameters

SI 32768  
SF 300.1300009 MHz  
WDW EM  
SSB 0  
LB 0.30 Hz  
GB 0  
PC 1.00

—197.376

—167.019

149.367  
136.857  
130.090  
127.959  
126.211  
125.665  
125.239  
123.061  
121.355  
120.060  
119.084  
118.678  
116.559  
113.551  
112.089

40.145  
39.937  
39.727  
39.518  
39.309  
39.099  
38.890  
37.017  
28.982  
27.591  
20.541

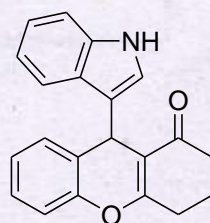

5d

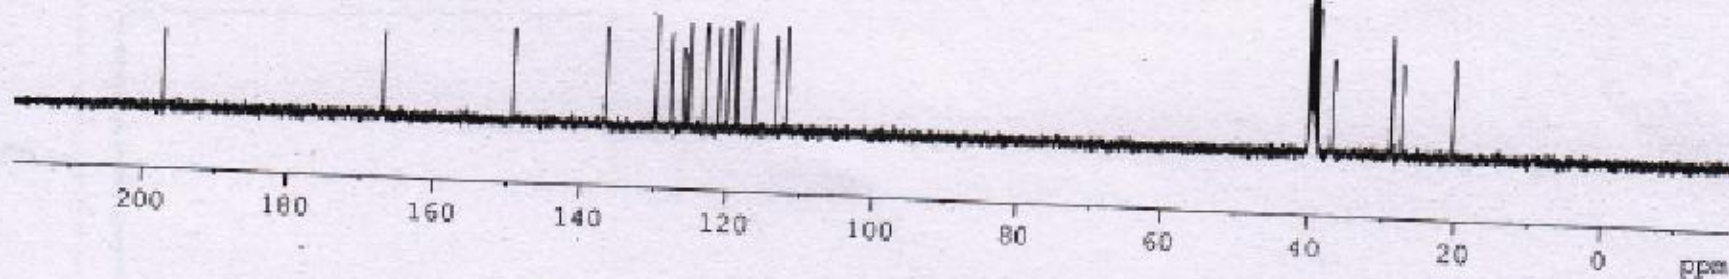

User : Admin  
 Sample : SEL-A  
 Inj. Volume : 5.000  
 Data Name : C:\LCMSsolution\User\Data\SEL-A-APCI-POS1.qld  
 Method Name : C:\LCMSsolution\User\Method\esi.qlm

# MS Spectrum

Line#:1 RTime:0.772(Scan#:47) Positive  
 MassPeaks:246 BasePeak:316.10(4308381)  
 RawMode:Single 0.772(47)  
 BG Mode:Peak Start 0.560(34)

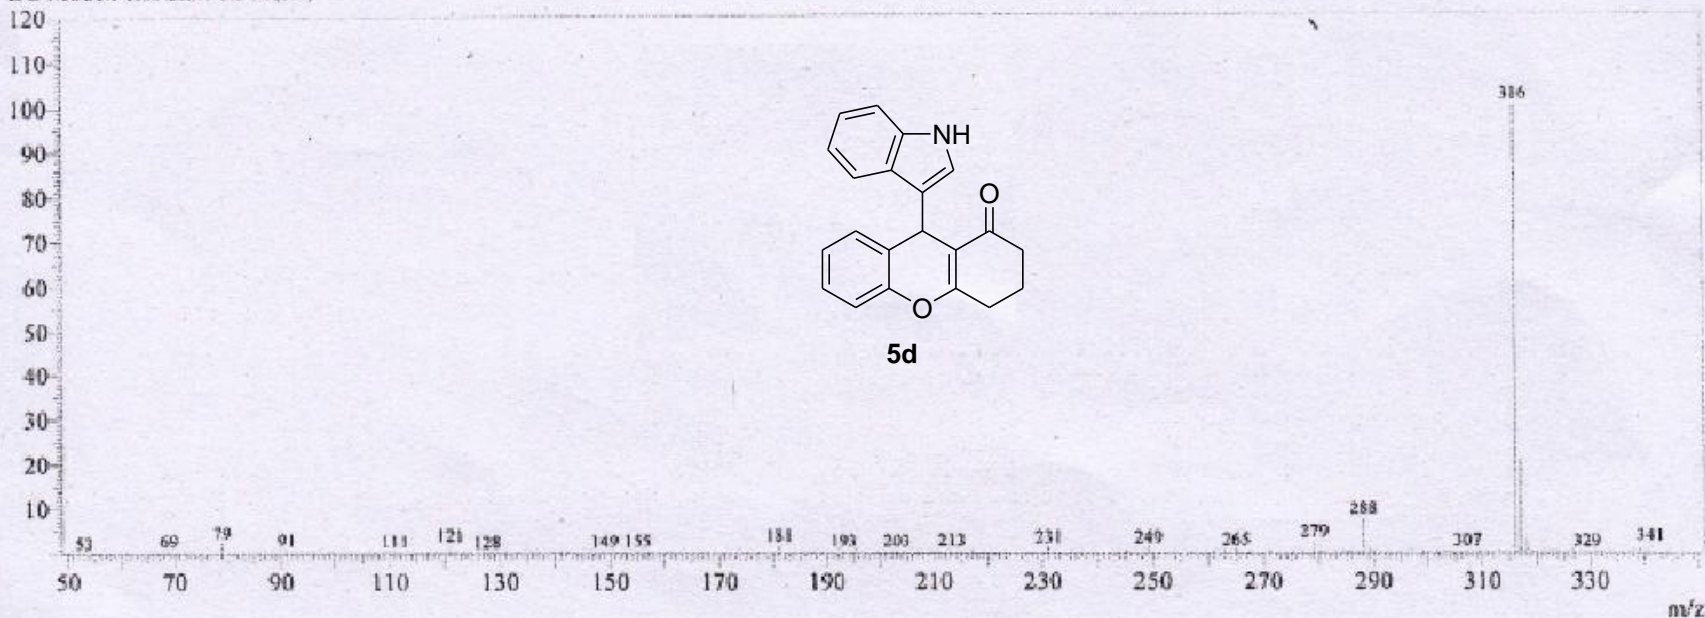

## MS Peak Table

| Peak# | R.Time | I.Time | F.Time | Area      | Height   | A/H   | Mark | %Total | Name |
|-------|--------|--------|--------|-----------|----------|-------|------|--------|------|
| 1     | 0.772  | 0.560  | 1.110  | 135371879 | 12071155 | 11.21 |      | 100.00 |      |
|       |        |        |        | 135371879 | 12071155 |       |      | 100.00 |      |

Base m/z: 316.10  
 Base Int.: 4308381

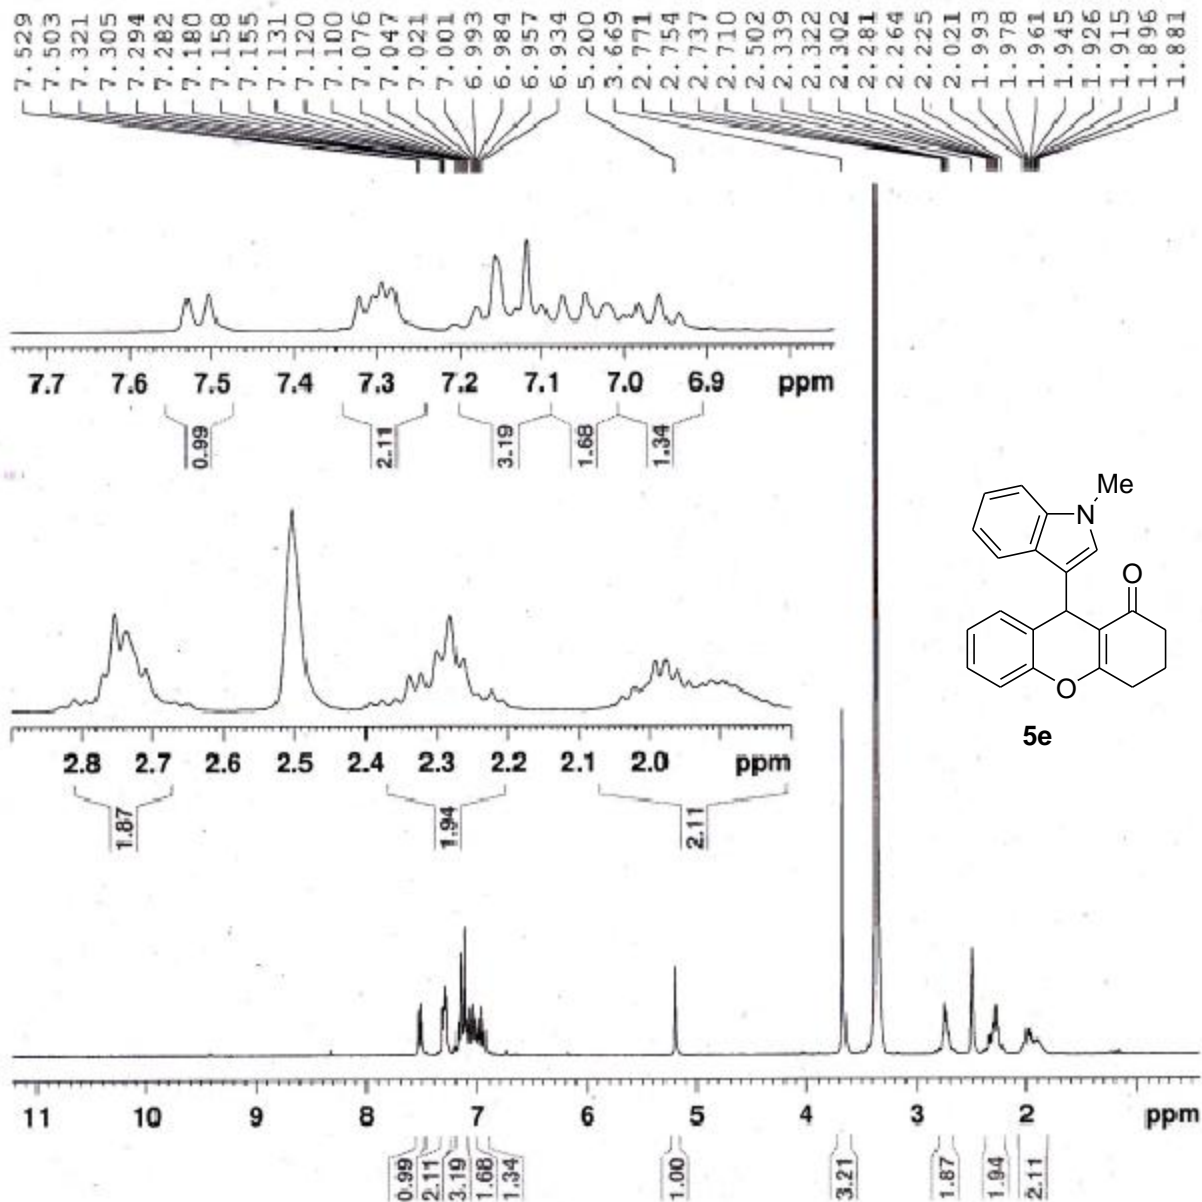

Current Data Parameters  
NAME 1059D  
EXPNO 1  
PROCNO 1

F2 - Acquisition Parameters  
Date\_ 20141019  
Time 15.49  
INSTRUM spect  
PROBHD 5 mm BBO BB-1H  
PULPROG zg30  
TD 65536  
SOLVENT DMSO  
NS 16  
DS 2  
SWH 6198.119 Hz  
FIDRES 0.094423 Hz  
AQ 5.2953587 sec  
RG 203  
DW 80.800 usec  
DE 6.00 usec  
TE 300.0 K  
D1 1.00000000 sec  
TD0 1

----- CHANNEL f1 -----  
NUC1 1H  
P1 8.60 usec  
PL1 -2.00 dB  
SFO1 300.1318534 MHz

F2 - Processing parameters  
SI 32768  
SF 300.1300004 MHz  
WDW EM  
SSB 0  
LB 0.30 Hz  
GB 0  
PC 1.00

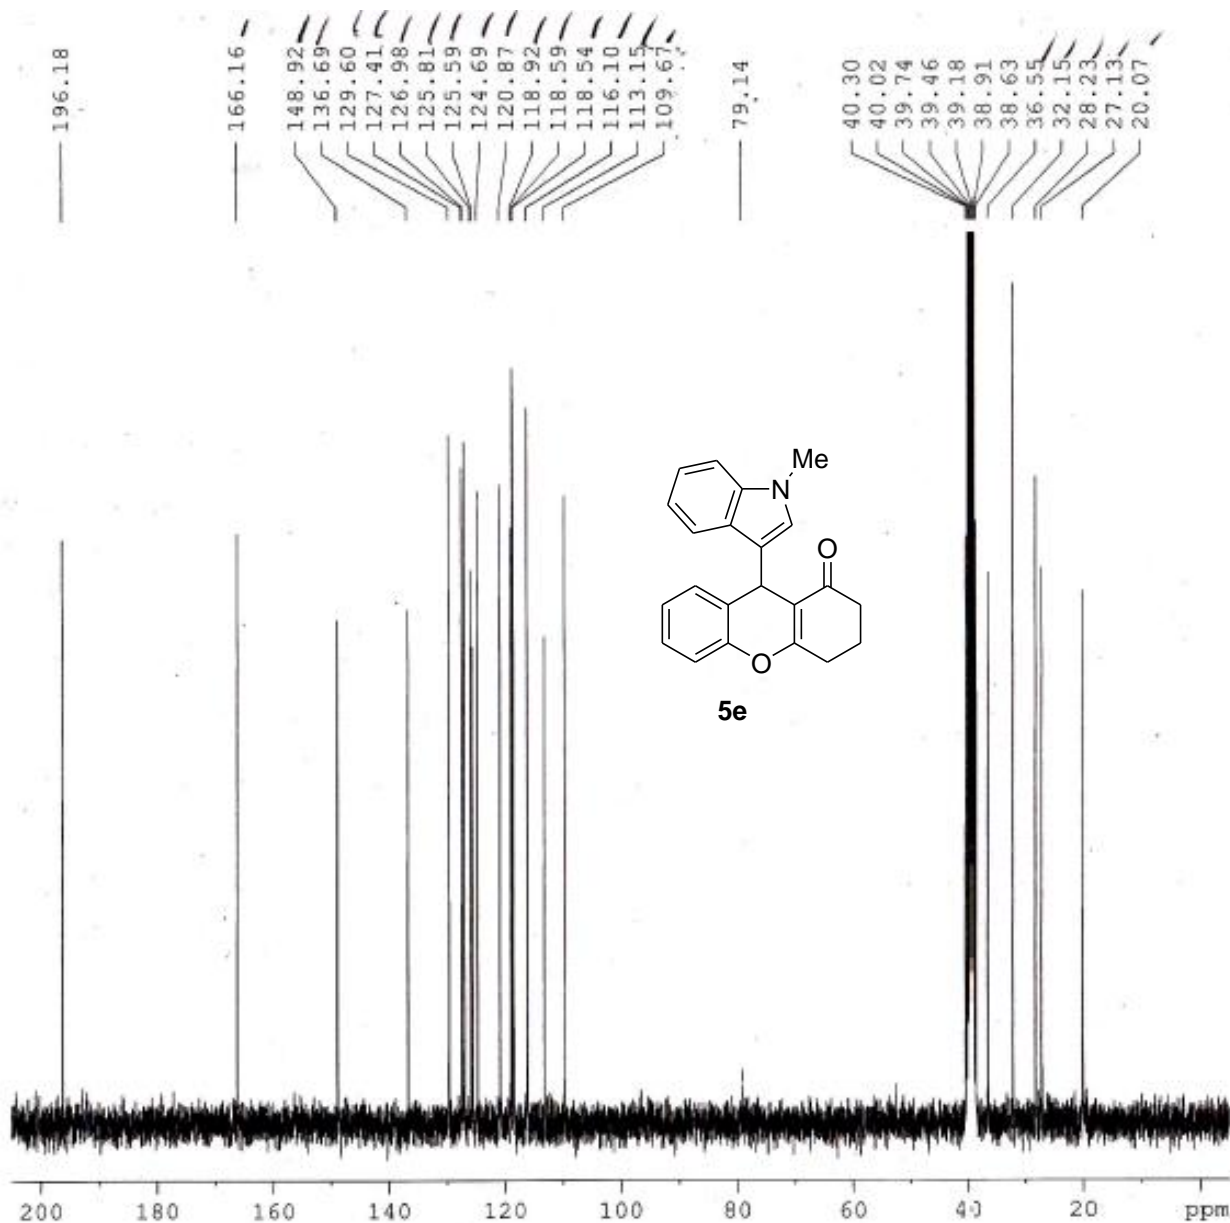

Current Data Parameters  
 NAME 1073A  
 EXPNO 1  
 PROCNO 1

F2 - Acquisition Parameters  
 Date\_ 20141024  
 Time 11.31  
 INSTRUM spect  
 PROBHD 5 mm BBO BB-1H  
 PULPROG zgpg30  
 TD 65536  
 SOLVENT DMSO  
 NS 603  
 DS 4  
 SWH 18028.846 Hz  
 FIDRES 0.275098 Hz  
 AQ 1.8175818 sec  
 RG 362  
 DW 27.733 usec  
 DE 6.00 usec  
 TE 300.0 K  
 D1 2.00000000 sec  
 d11 0.03000000 sec  
 DELTA 1.89999998 sec  
 TDO 1

===== CHANNEL f1 =====  
 NUC1 13C  
 P1 9.50 usec  
 PL1 0.00 dB  
 SFO1 75.4752953 MHz

===== CHANNEL f2 =====  
 CPDPRG2 waltz16  
 NUC2 1H  
 PCPD2 80.00 usec  
 PL2 -2.00 dB  
 PL12 17.37 dB  
 PL13 20.00 dB  
 SFO2 300.1312005 MHz

F2 - Processing parameters  
 SI 32768  
 SF 75.4677867 MHz  
 WDW EM  
 SSB 0  
 LB 1.00 Hz  
 GB 0  
 PC 1.40

User : Admin  
Sample : SEL-B  
Inj. Volume : 5.000  
Data Name : C:\LCMSsolution\User\Data\SEL-B-APCI-POS1.qld  
Method Name : C:\LCMSsolution\User\Method\esi.qlm

MS Spectrum

Line#-1 R.Time:0.809(Scan#:49) Positive  
MassPeaks:629 BasePeak:330.15(15762060)  
RawMode:Single 0.809(49)  
BG Mode:Peak Start 0.527(32)

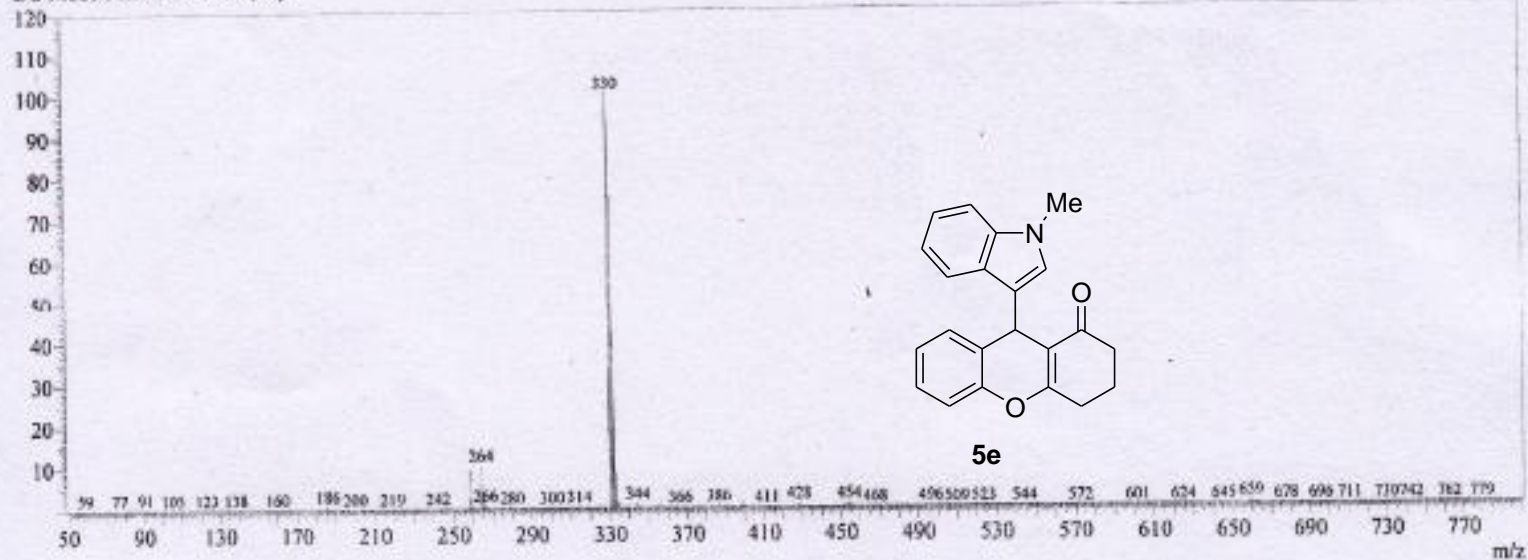

| MS Peak Table |         |         |         |           |          |       |      |        |      |
|---------------|---------|---------|---------|-----------|----------|-------|------|--------|------|
| Peak#         | R. Time | I. Time | F. Time | Area      | Height   | A/H   | Mark | %Total | Name |
| 1             | 0.809   | 0.527   | 1.243   | 909626621 | 42484149 | 21.41 |      | 100.00 |      |
|               |         |         |         | 909626621 | 42484149 |       |      | 100.00 |      |

Base m/z: Base Int.  
330.15 15762060

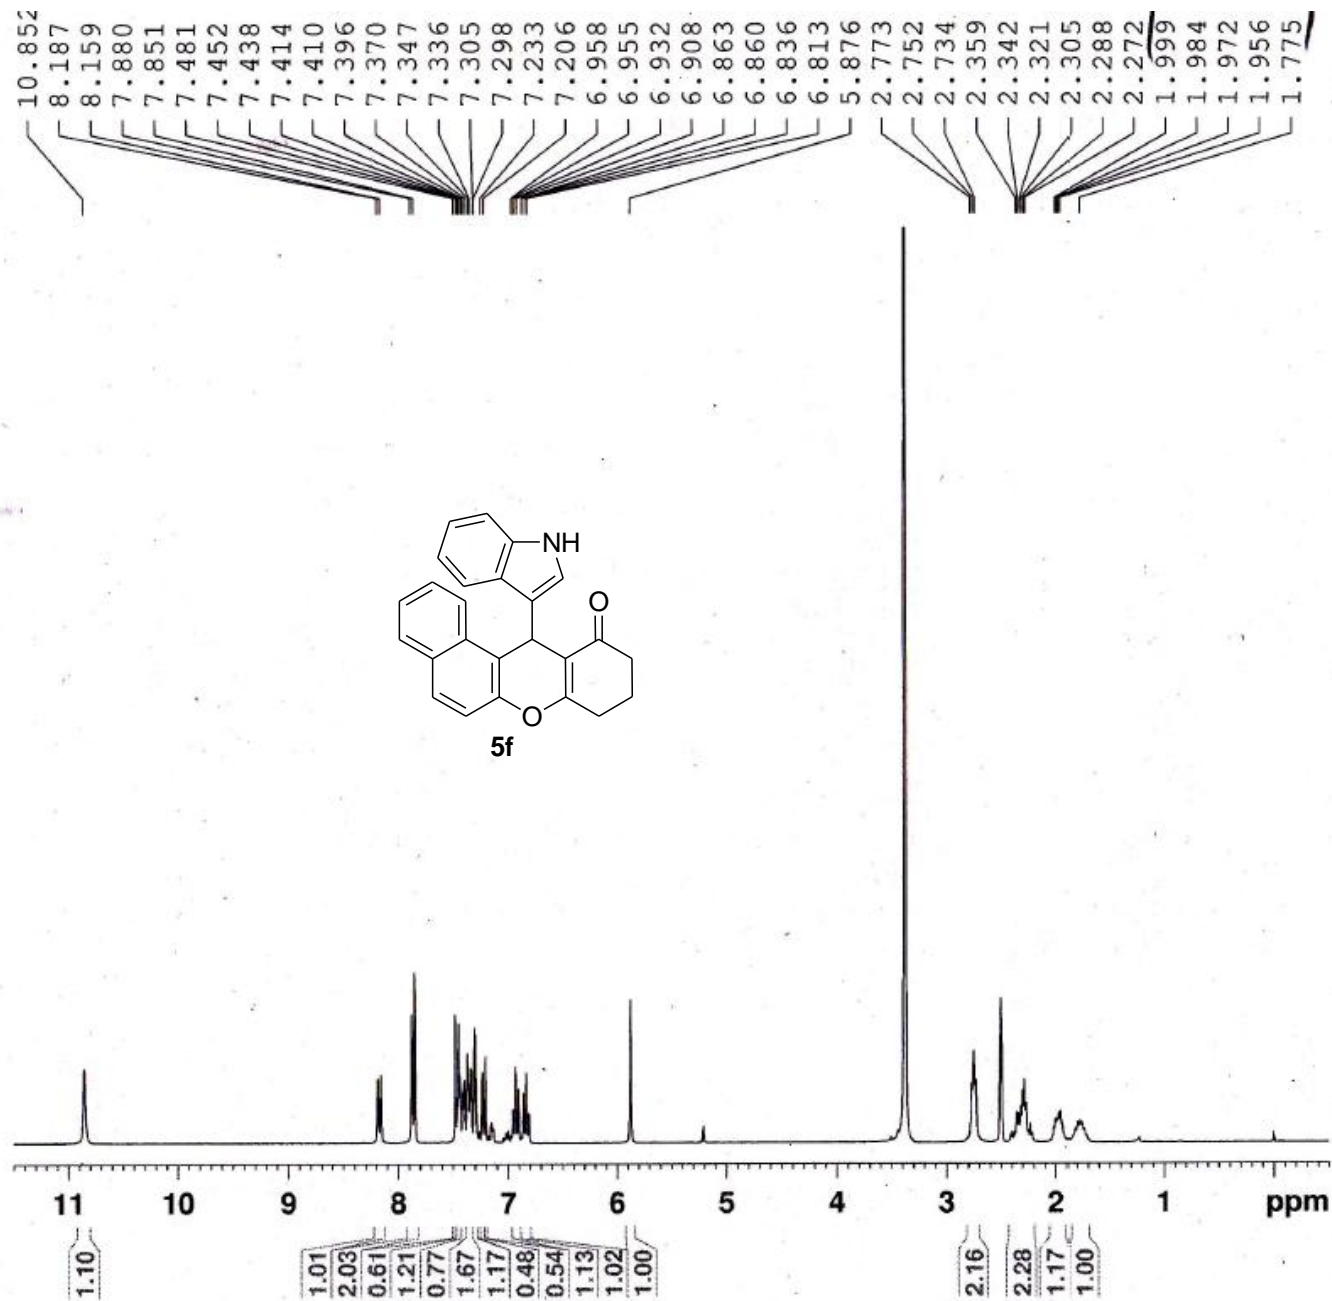

Current Data Parameters  
 NAME 1065B  
 EXPNO 1  
 PROCNO 1

F2 - Acquisition Parameters  
 Date\_ 20141016  
 Time 16.52  
 INSTRUM spect  
 PROBHD 5 mm BBO BB-1H  
 PULPROG zg30  
 TD 65536  
 SOLVENT DMSO  
 NS 16  
 DS 2  
 SWH 6188.119 Hz  
 FIDRES 0.094423 Hz  
 AQ 5.2953587 sec  
 RG 181  
 DW 80.800 usec  
 DE 6.00 usec  
 TE 300.0 K  
 D1 1.00000000 sec  
 TD0 1

----- CHANNEL f1 -----  
 NUC1 1H  
 P1 8.60 usec  
 PL1 -2.00 dB  
 SFO1 300.1318534 MHz

F2 - Processing parameters  
 SI 32768  
 SF 300.1300003 MHz  
 WDW EM  
 SSB 0  
 LB 0.30 Hz  
 GB 0  
 PC 1.00

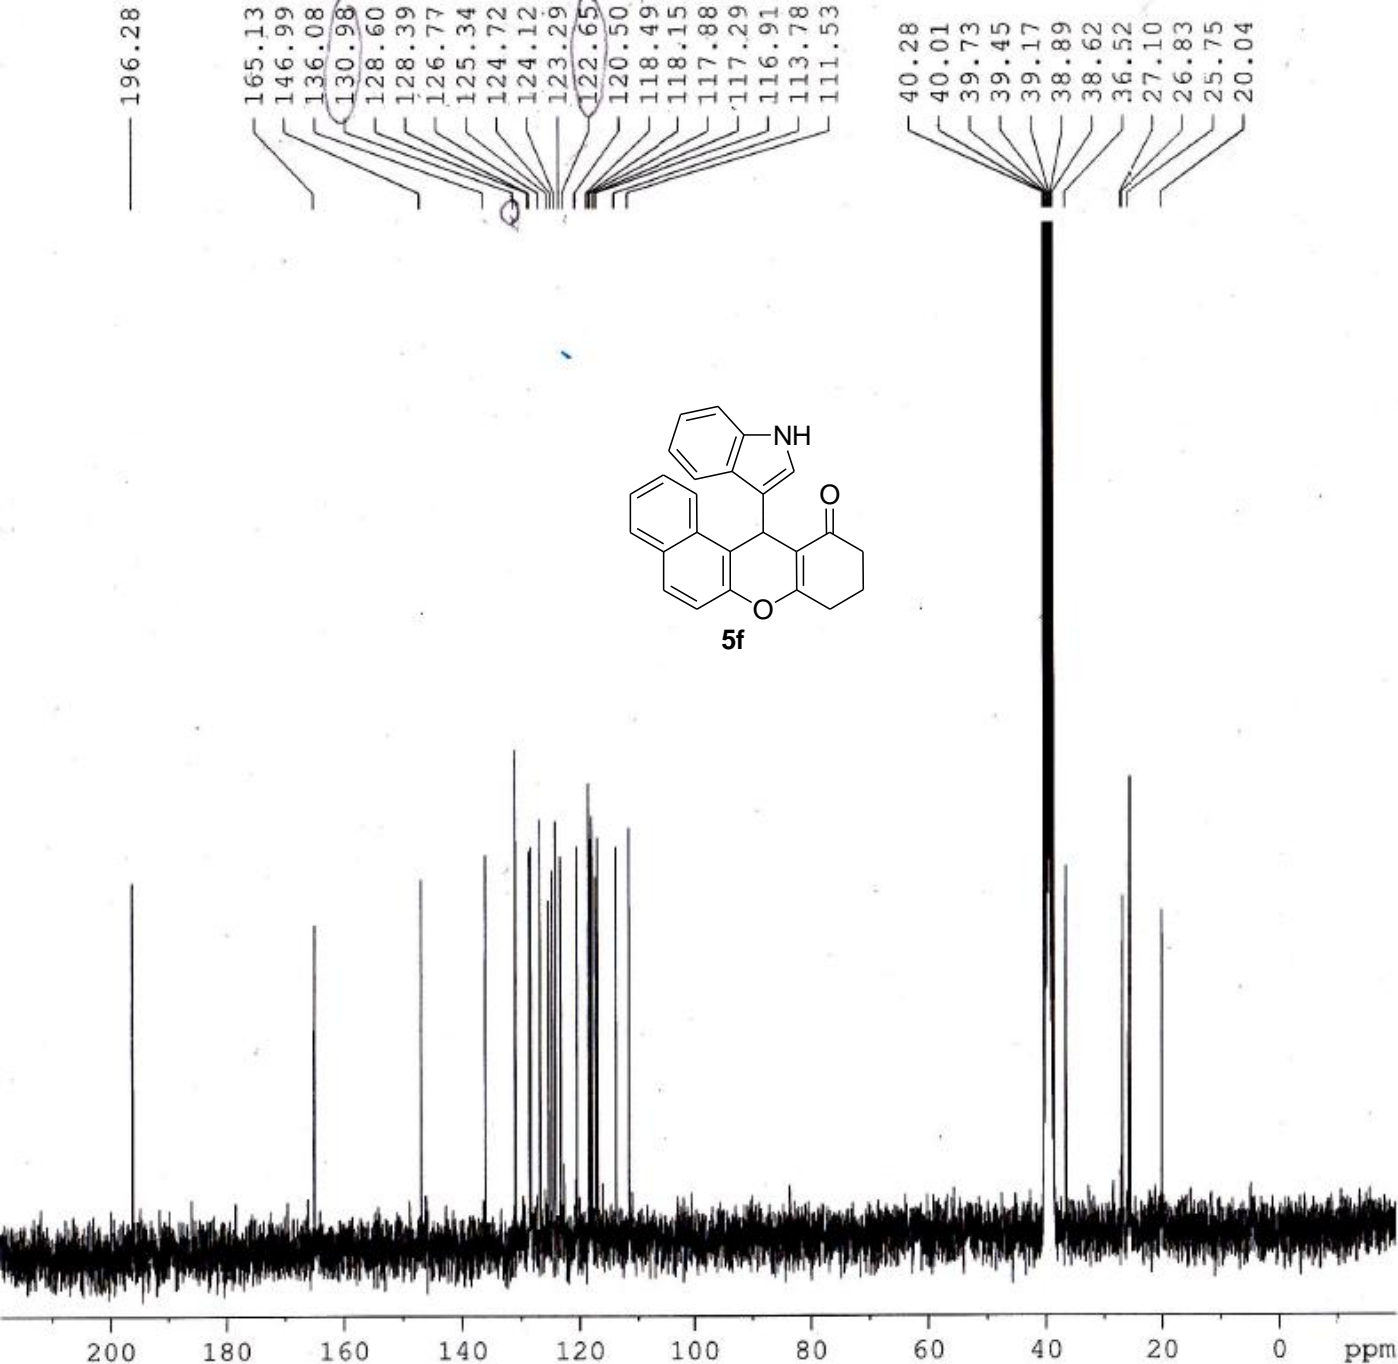

Current Data Parameters  
NAME 1074B  
EXPNO 1  
PROCNO 1

F2 - Acquisition Parameters  
Date\_ 20141025  
Time 16.57  
INSTRUM spect  
PROBHD 5 mm BBO BB-1H  
PULPROG zgpg30  
TD 65536  
SOLVENT DMSO  
NS 1462  
DS 4  
SWH 18028.846 Hz  
FIDRES 0.275098 Hz  
AQ 1.8175818 sec  
RG 322  
DW 27.733 usec  
DE 6.00 usec  
TE 300.0 K  
D1 2.00000000 sec  
d11 0.03000000 sec  
DELTA 1.89999998 sec  
TD0 1

===== CHANNEL f1 =====  
NUC1 13C  
P1 9.50 usec  
PL1 0.00 dB  
SFO1 75.4752953 MHz

===== CHANNEL f2 =====  
CPDPRG2 waltz16  
NUC2 1H  
PCPD2 80.00 usec  
PL2 -2.00 dB  
PL12 17.37 dB  
PL13 20.00 dB  
SFO2 300.1312005 MHz

F2 - Processing parameters  
SI 32768  
SF 75.4677867 MHz  
WDW EM  
SSB 0  
LB 1.00 Hz  
GB 0  
PC 1.40

User : Admin  
 Sample : SEL-E  
 Inj. Volume : 5.000  
 Data Name : C:\LCMSSolution\User\Data\SEL-E-APCI-POS1.qld  
 Method Name : C:\LCMSSolution\User\Method\esi.qlm

# MS Spectrum

Line# 1 R.Time:0.754(Scan# 46) Positive  
 MassPeaks 268 BasePeak 366.15(9469886)  
 RawMode:Single 0.754(46)  
 BG Mode:Peak Start 0.610(37)

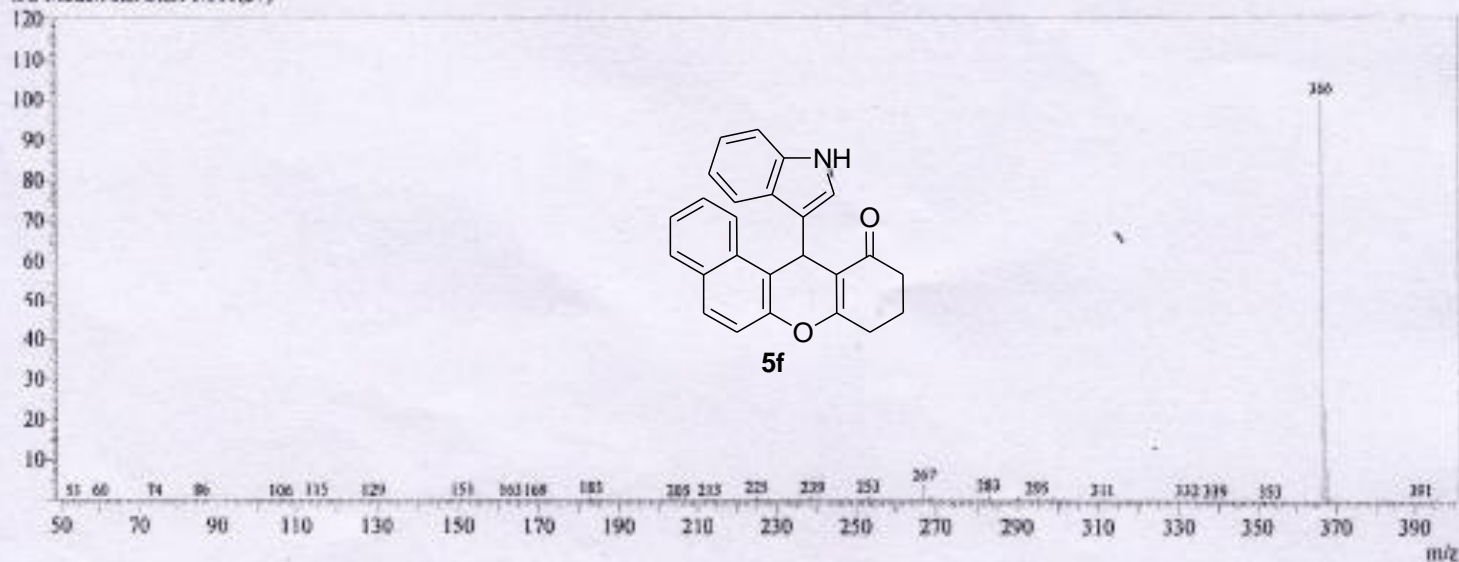

## MS Peak Table

| Peak# | R. Time | I. Time | F. Time | Area      | Height   | A/H   | Mark | %Total | Name |
|-------|---------|---------|---------|-----------|----------|-------|------|--------|------|
| 1     | 0.754   | 0.610   | 0.993   | 195390900 | 17335826 | 11.27 |      | 100.00 |      |
|       |         |         |         | 195390900 | 17335826 |       |      | 100.00 |      |

Base m/z Base Int  
 366.15 9469886

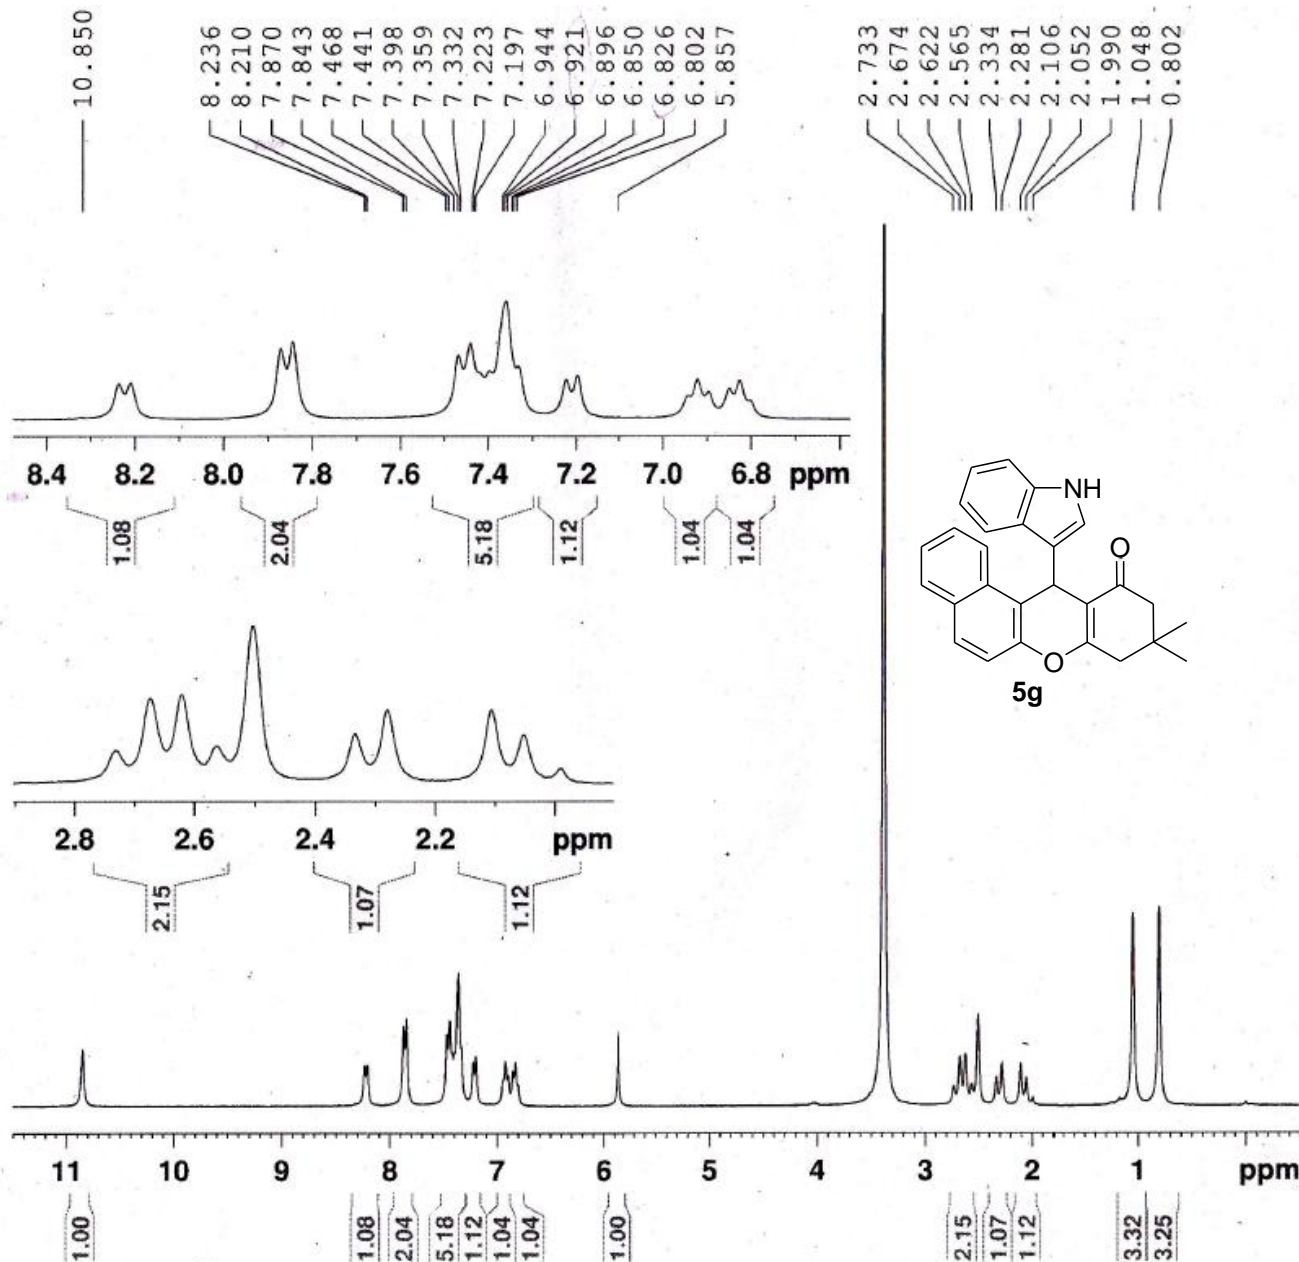

Current Data Parameters  
 NAME 1065A  
 EXPNO 1  
 PROCNO 1

F2 - Acquisition Parameters  
 Date\_ 20141016  
 Time 16.46  
 INSTRUM spect  
 PROBHD 5 mm BBO BB-1H  
 PULPROG zg30  
 TD 65536  
 SOLVENT DMSO  
 NS 16  
 DS 2  
 SWH 6188.119 Hz  
 FIDRES 0.094423 Hz  
 AQ 5.2953587 sec  
 RG 181  
 DW 80.800 usec  
 DE 6.00 usec  
 TE 300.0 K  
 D1 1.00000000 sec  
 TD0 1

===== CHANNEL f1 =====  
 NUC1 1H  
 P1 8.60 usec  
 PL1 -2.00 dB  
 SFO1 300.1318534 MHz

F2 - Processing parameters  
 SI 32768  
 SF 300.1299997 MHz  
 WDW EM  
 SSB 0  
 LB 0.30 Hz  
 GB 0  
 PC 1.00

196.06

163.20  
146.93  
136.08  
131.01  
128.59  
128.38  
126.74  
125.27  
124.70  
124.10  
123.36  
120.48  
118.38  
118.16  
117.67  
117.19  
116.96  
112.47  
111.51

50.22  
40.30  
40.02  
39.74  
39.46  
39.18  
38.91  
38.63  
31.74  
28.78  
26.35  
25.86

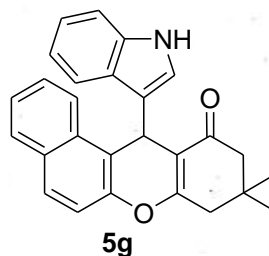

Current Data Parameters  
NAME 1074C  
EXPNO 1  
PROCNO 1

F2 - Acquisition Parameters  
Date\_ 20141027  
Time 12.10  
INSTRUM spect  
PROBHD 5 mm BBO BB-1H  
PULPROG zgpg30  
TD 65536  
SOLVENT DMSO  
NS 1185  
DS 4  
SWH 18028.846 Hz  
FIDRES 0.275098 Hz  
AQ 1.8175818 sec  
RG 287  
DW 27.733 usec  
DE 6.00 usec  
TE 300.0 K  
D1 2.00000000 sec  
d11 0.03000000 sec  
DELTA 1.89999998 sec  
TD0 1

===== CHANNEL f1 =====  
NUC1 13C  
P1 9.50 usec  
PL1 0.00 dB  
SFO1 75.4752953 MHz

===== CHANNEL f2 =====  
CPDPRG2 waltz16  
NUC2 1H  
PCPD2 80.00 usec  
PL2 -2.00 dB  
PL12 17.37 dB  
PL13 20.00 dB  
SFO2 300.1312005 MHz

F2 - Processing parameters  
SI 32768  
SF 75.4677867 MHz  
WDW EM  
SSB 0  
LB 1.00 Hz  
GB 0  
PC 1.40

200 180 160 140 120 100 80 60 40 20 ppm

User : Admin  
 Sample : SEL-D  
 Inj. Volume : 5.000  
 Data Name : C:\LCMSsolution\User\Data\SEL-D-APCI-POS1.qld  
 Method Name : C:\LCMSsolution\User\Method\esi.qlm

# MS Spectrum

Line# 1 R.Time: 0.765 (Scan# 46) Positive  
 MassPeaks: 238 BasePeak: 394.40 (9529569)  
 RawMode: Single 0.765 (46)  
 BG Mode: Peak Start 0.527 (32)

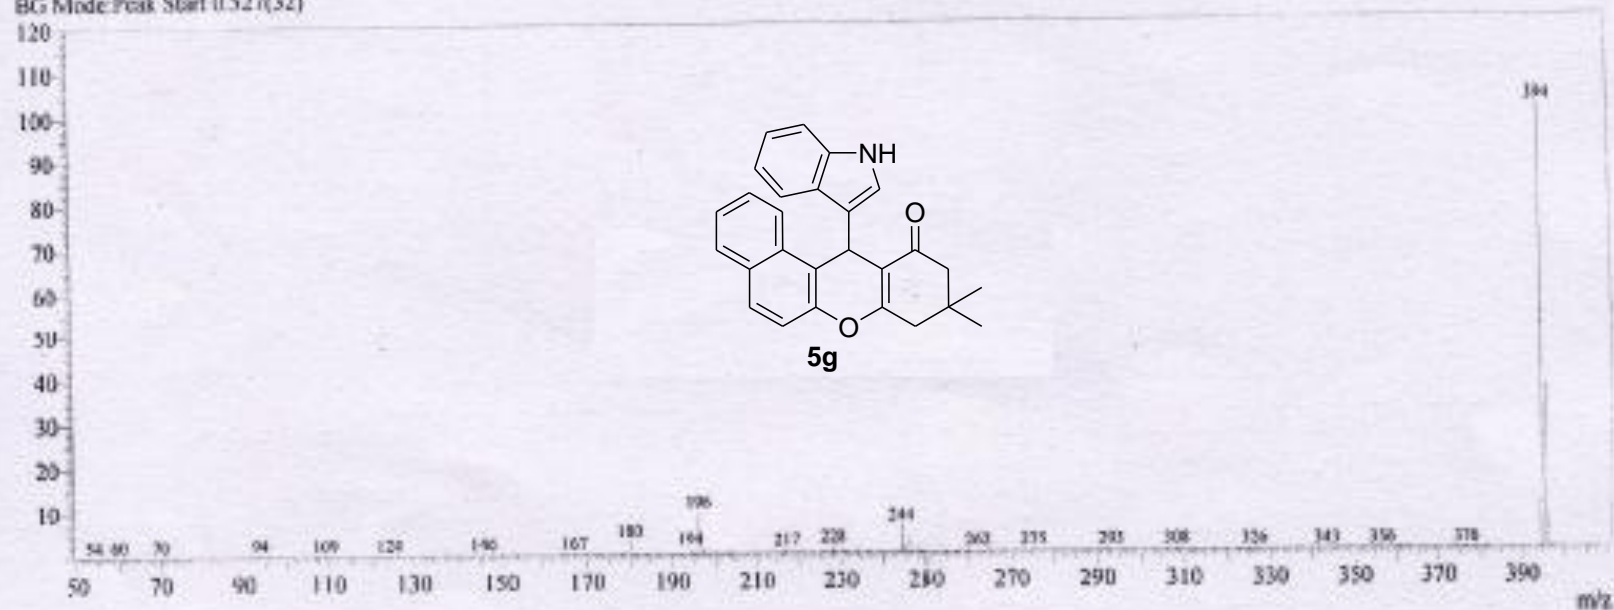

| MS Peak Table |         |         |         |           |          |       |      |        |      |  |
|---------------|---------|---------|---------|-----------|----------|-------|------|--------|------|--|
| Peak#         | R. Time | L. Time | F. Time | Area      | Height   | A/H   | Mark | %Total | Name |  |
| 1             | 0.765   | 0.527   | 1.043   | 130690240 | 10465791 | 12.48 |      | 100.00 |      |  |
|               |         |         |         | 130690240 | 10465791 |       |      | 100.00 |      |  |

Base m/z: 394.40  
 Base Int: 9529569

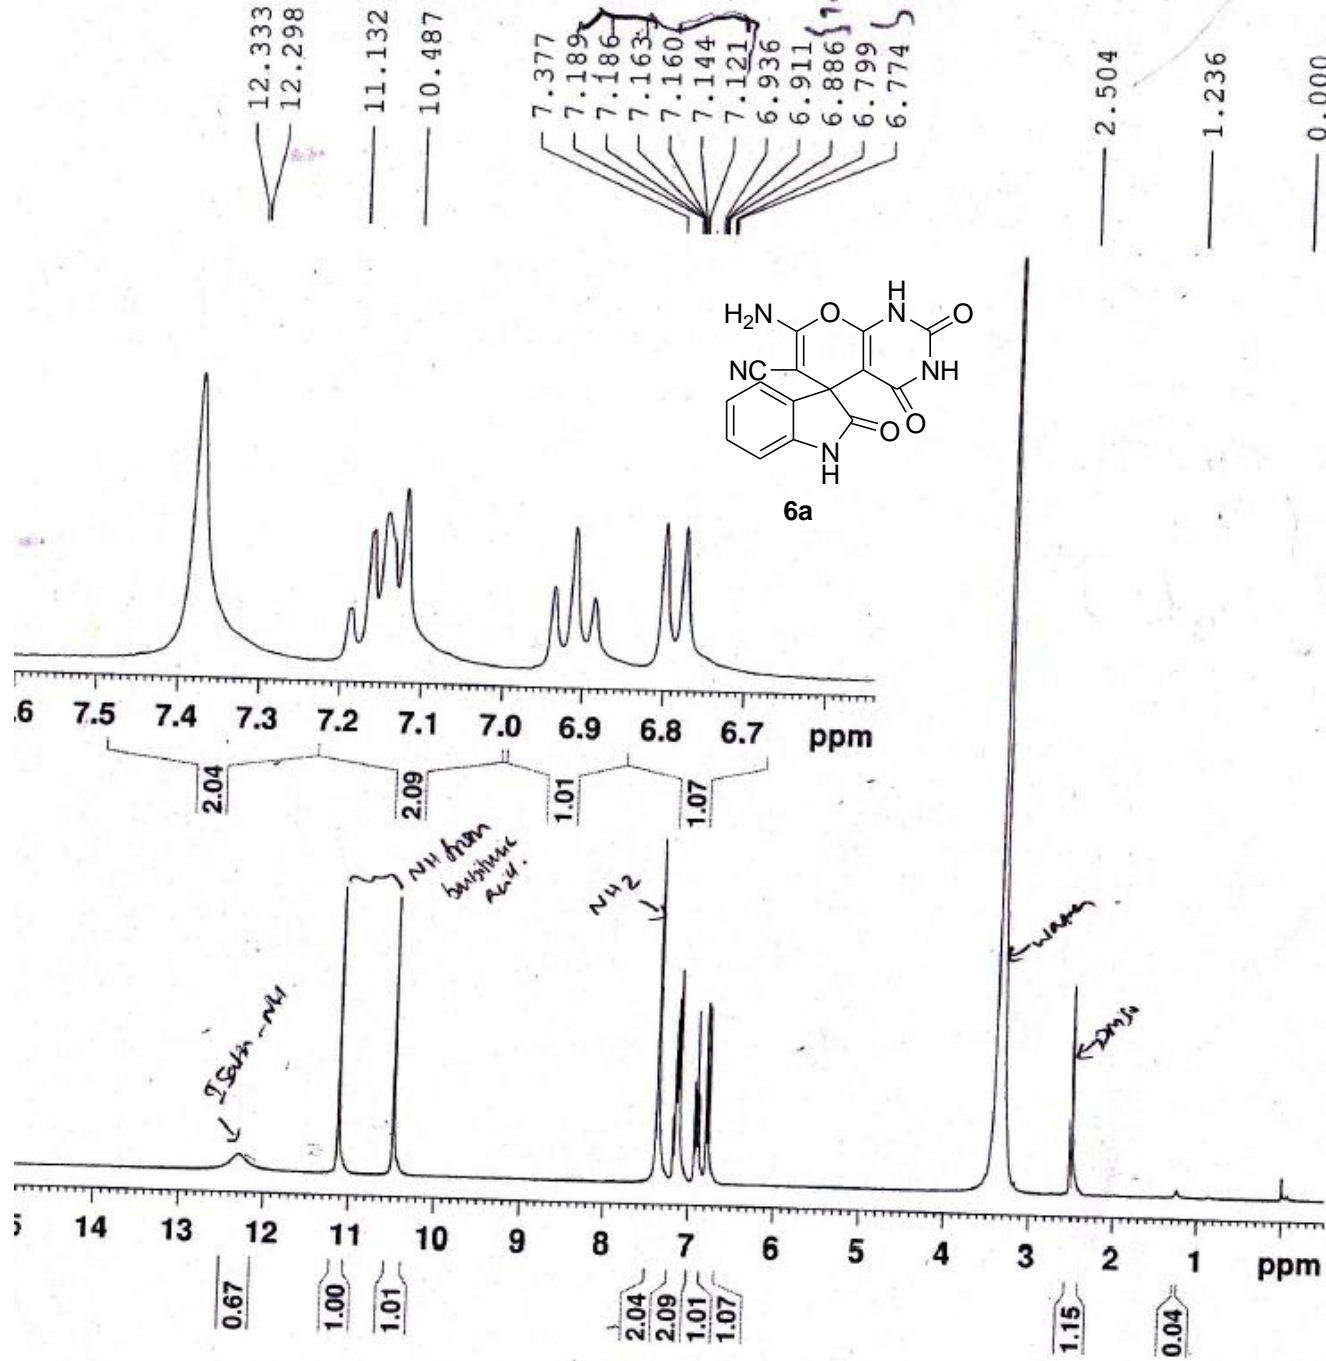

Current Data Parameters  
NAME 1049C  
EXPNO 1  
PROCNO 1

F2 - Acquisition Parameters  
Date\_ 20141015  
Time 12.34  
INSTRUM spect  
PROBHD 5 mm BBO BB-1H  
PULPROG zg30  
TD 65536  
SOLVENT DMSO  
NS 16  
DS 2  
SWH 6188.119 Hz  
FIDRES 0.094423 Hz  
AQ 5.2953587 sec  
RG 228  
DW 80.800 usec  
DE 6.00 usec  
TE 300.0 K  
D1 1.00000000 sec  
TD0 1

===== CHANNEL f1 =====  
NUC1 1H  
P1 8.60 usec  
PL1 -2.00 dB  
SFO1 300.1318534 MHz

F2 - Processing parameters  
SI 32768  
SF 300.1300001 MHz  
WDW EM  
SSB 0  
LB 0.30 Hz  
GB 0  
PC 1.00

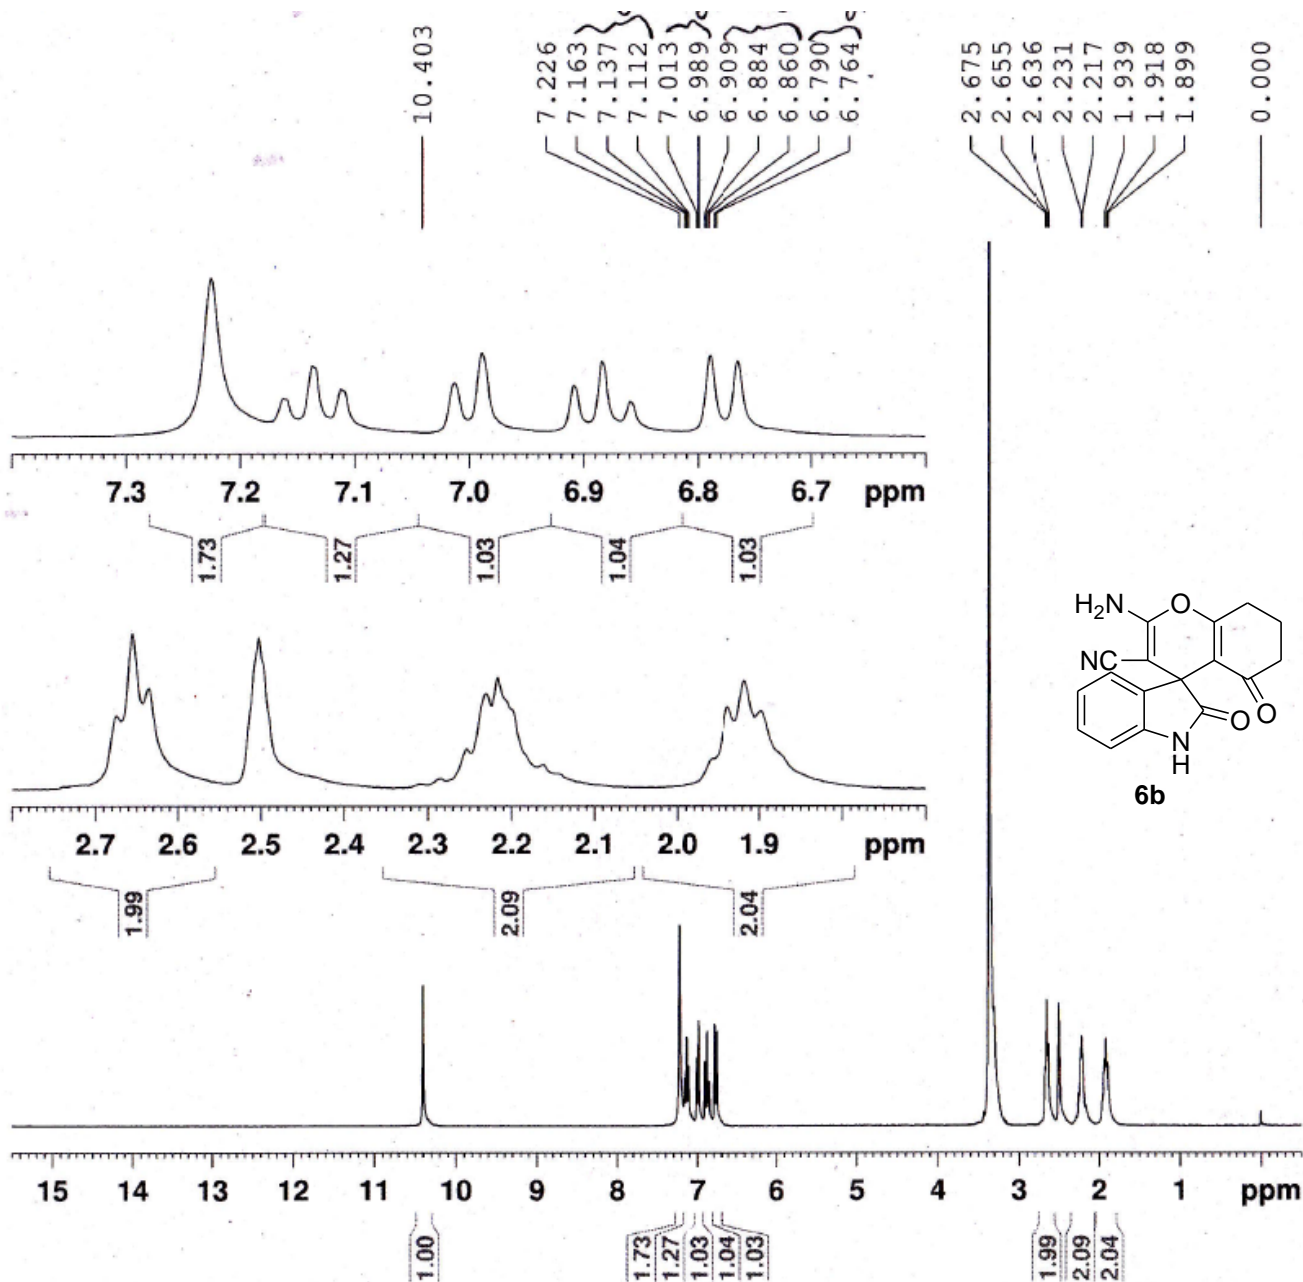

Current Data Parameters  
 NAME 1049B  
 EXPNO 1  
 PROCNO 1

F2 - Acquisition Parameters  
 Date\_ 20141015  
 Time 12.26  
 INSTRUM spect  
 PROBHD 5 mm BBO BB-1H  
 PULPROG zg30  
 TD 65536  
 SOLVENT DMSO  
 NS 16  
 DS 2  
 SWH 6188.119 Hz  
 FIDRES 0.094423 Hz  
 AQ 5.2953587 sec  
 RG 228  
 DW 80.800 usec  
 DE 6.00 usec  
 TE 300.0 K  
 D1 1.00000000 sec  
 TD0 1

===== CHANNEL f1 =====  
 NUC1 1H  
 P1 8.60 usec  
 PL1 -2.00 dB  
 SFO1 300.1318534 MHz

F2 - Processing parameters  
 SI 32768  
 SF 300.1300004 MHz  
 WDW EM  
 SSB 0  
 LB 0.30 Hz  
 GB 0  
 PC 1.00

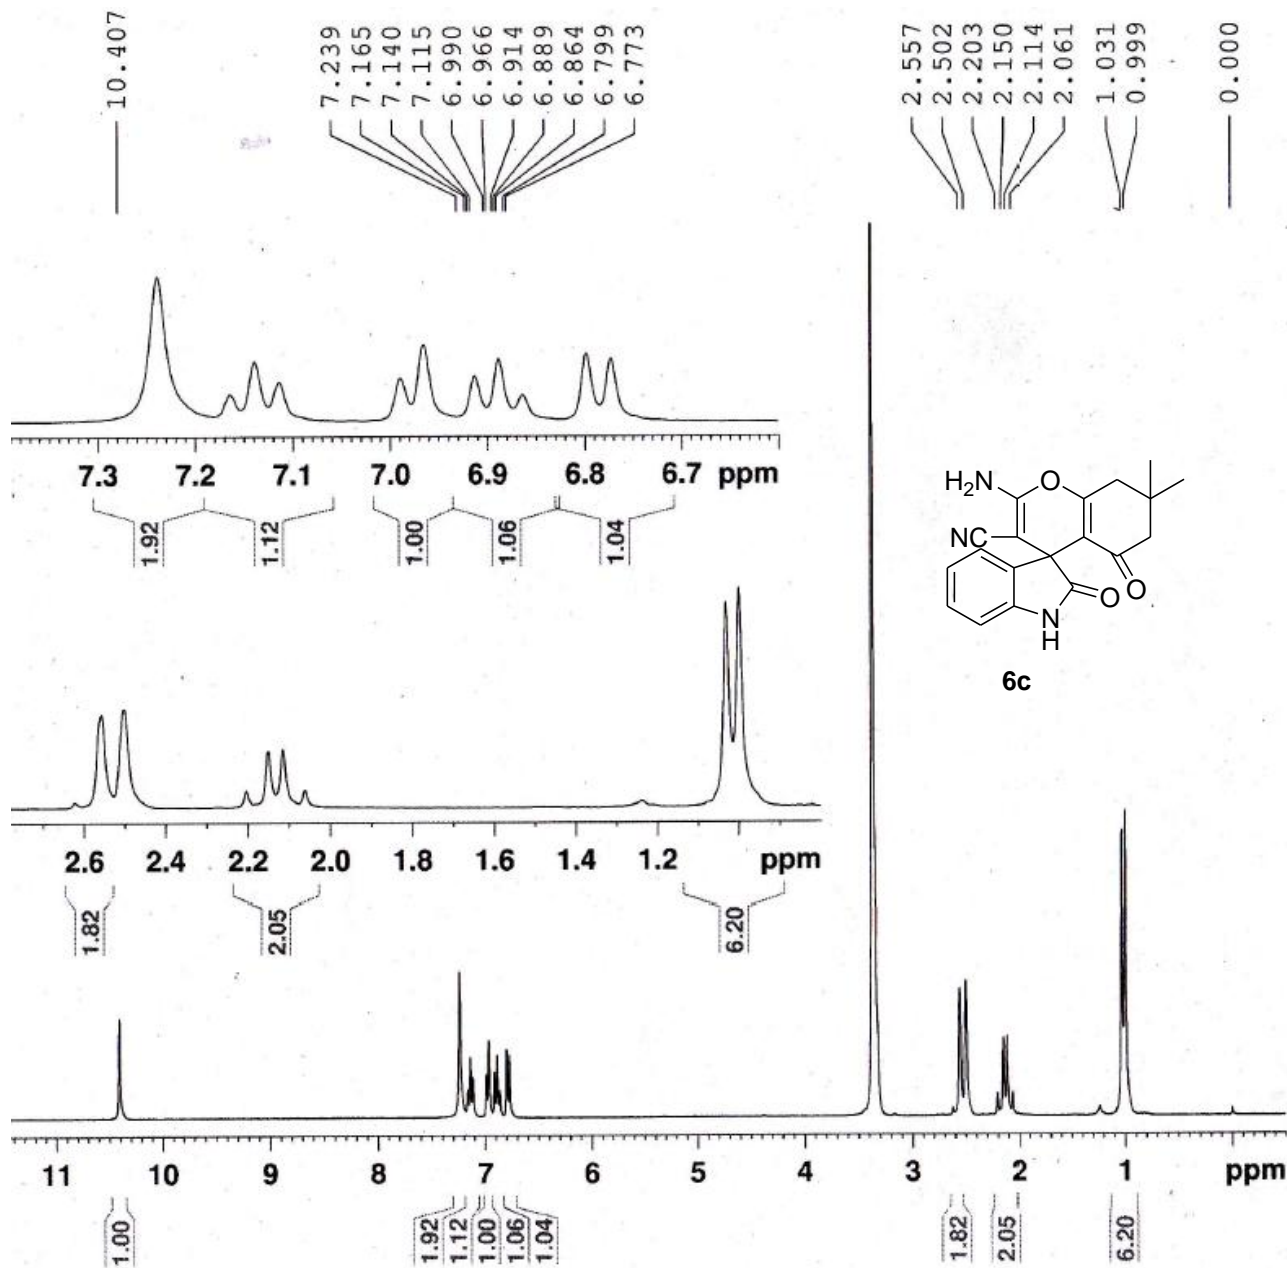

Current Data Parameters  
 NAME 1059C  
 EXPNO 1  
 PROCNO 1

F2 - Acquisition Parameters  
 Date\_ 20141015  
 Time 15.26  
 INSTRUM spect  
 PROBHD 5 mm BBO BB-1H  
 PULPROG zg30  
 TD 65536  
 SOLVENT DMSO  
 NS 16  
 DS 2  
 SWH 6188.119 Hz  
 FIDRES 0.094423 Hz  
 AQ 5.2953587 sec  
 RG 203  
 DW 80.800 usec  
 DE 6.00 usec  
 TE 300.0 K  
 D1 1.00000000 sec  
 TDO 1

----- CHANNEL f1 -----  
 NUC1 1H  
 P1 8.60 usec  
 PL1 -2.00 dB  
 SFO1 300.1318534 MHz

F2 - Processing parameters  
 SI 32768  
 SF 300.1300006 MHz  
 WDW EM  
 SSB 0  
 LB 0.30 Hz  
 GB 0  
 PC 1.00

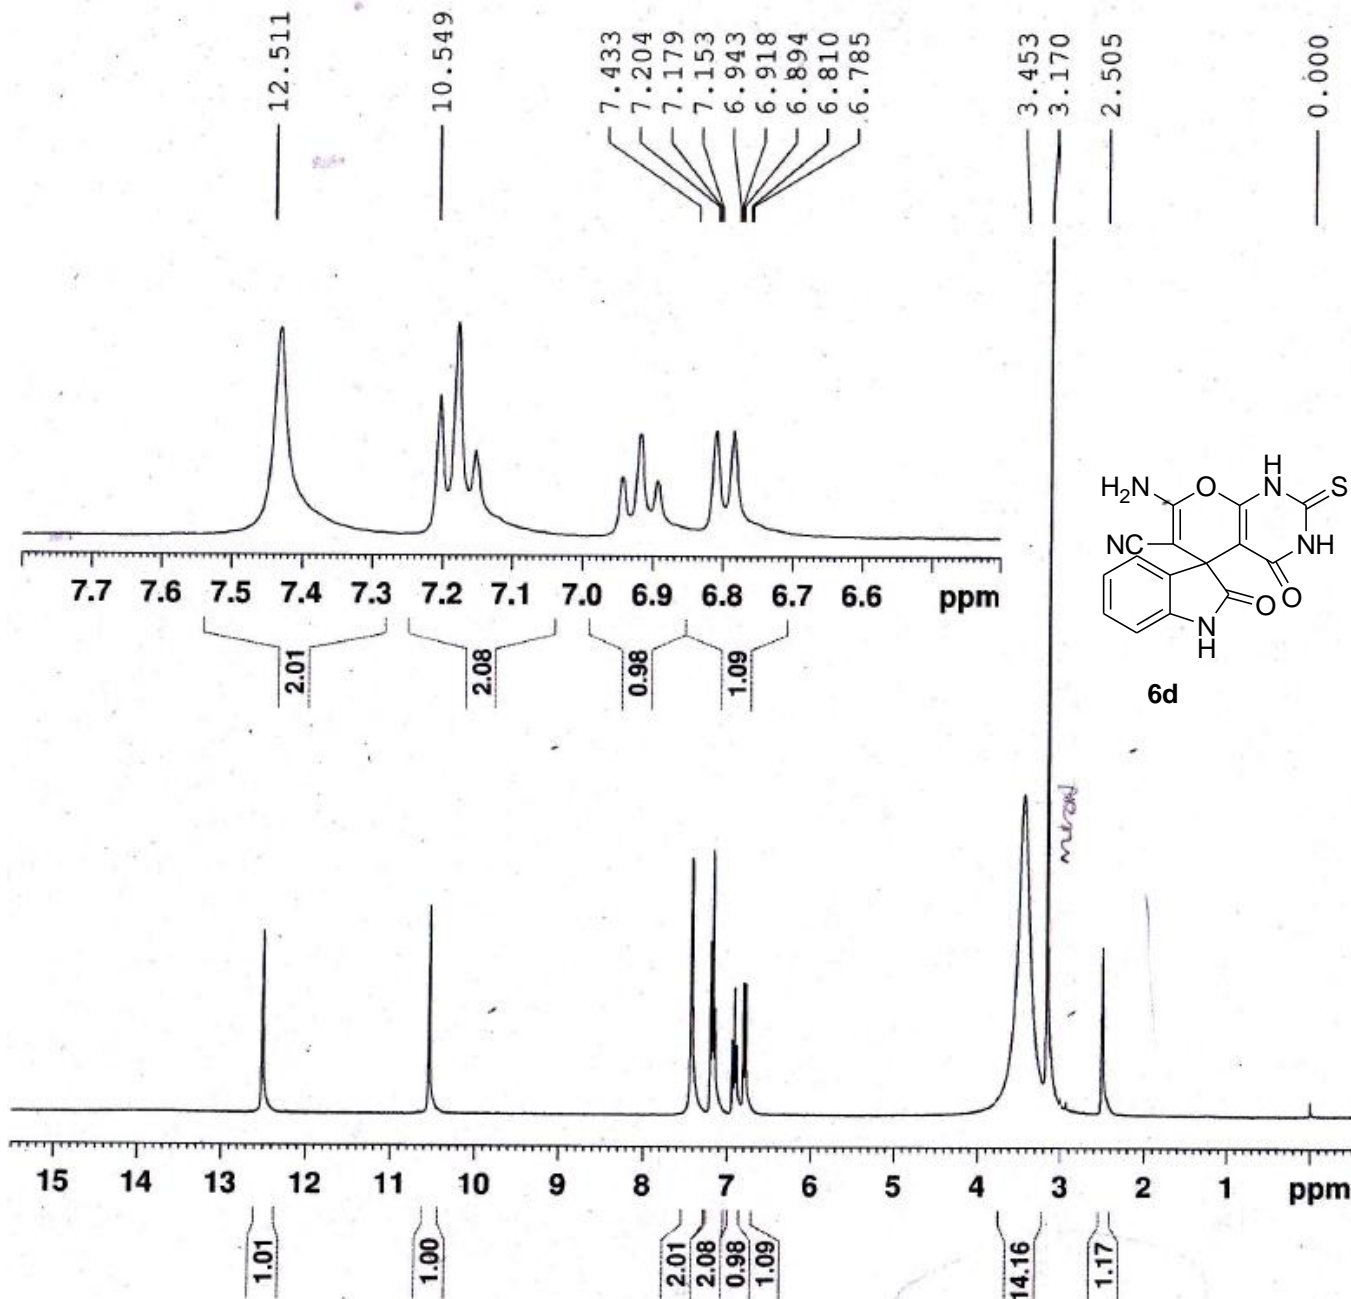

Current Data Parameters  
 NAME 1049A  
 EXPNO 1  
 PROCNO 1

F2 - Acquisition Parameters

Date\_ 20141015  
 Time 12.20  
 INSTRUM spect  
 PROBHD 5 mm BBO BB-1H  
 PULPROG zg30  
 TD 65536  
 SOLVENT DMSO  
 NS 16  
 DS 2  
 SWH 6188.119 Hz  
 FIDRES 0.094423 Hz  
 AQ 5.2953587 sec  
 RG 181  
 DW 80.800 usec  
 DE 6.00 usec  
 TE 300.0 K  
 D1 1.00000000 sec  
 TD0 1

===== CHANNEL f1 =====  
 NUC1 1H  
 P1 8.60 usec  
 PL1 -2.00 dB  
 SFO1 300.1318534 MHz

F2 - Processing parameters

SI 32768  
 SF 300.1299996 MHz  
 WDW EM  
 SSB 0  
 LB 0.30 Hz  
 GB 0  
 PC 1.00

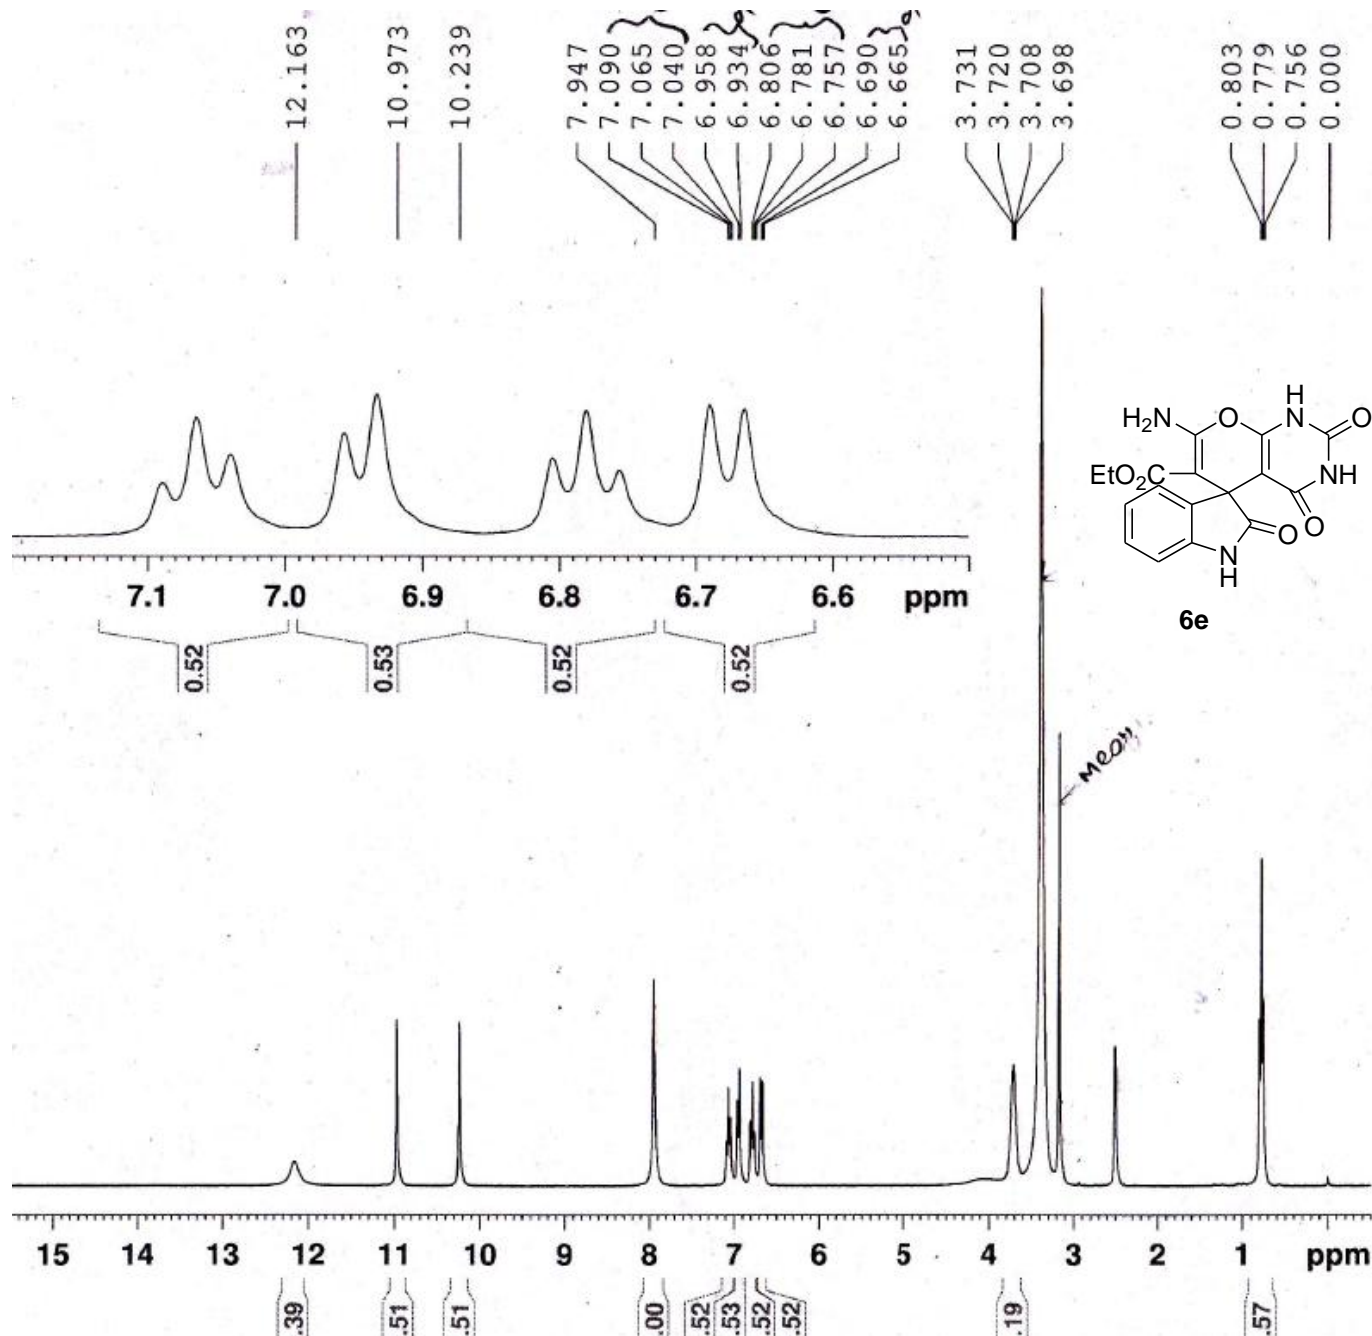

Current Data Parameters  
 NAME 1059E  
 EXPNO 1  
 PROCNO 1

F2 - Acquisition Parameters  
 Date\_ 20141015  
 Time 15.32  
 INSTRUM spect  
 PROBHD 5 mm BBO BB-1H  
 PULPROG zg30  
 TD 65536  
 SOLVENT DMSO  
 NS 16  
 DS 2  
 SWH 6188.119 Hz  
 FIDRES 0.094423 Hz  
 AQ 5.2953587 sec  
 RG 181  
 DW 80.800 usec  
 DE 6.00 usec  
 TE 300.0 K  
 D1 1.00000000 sec  
 TD0 1

----- CHANNEL f1 -----  
 NUC1 1H  
 P1 8.60 usec  
 PL1 -2.00 dB  
 SFO1 300.1318534 MHz

F2 - Processing parameters  
 SI 32768  
 SF 300.1299997 MHz  
 WDW EM  
 SSB 0  
 LB 0.30 Hz  
 GB 0  
 PC 1.00

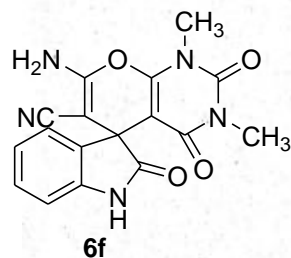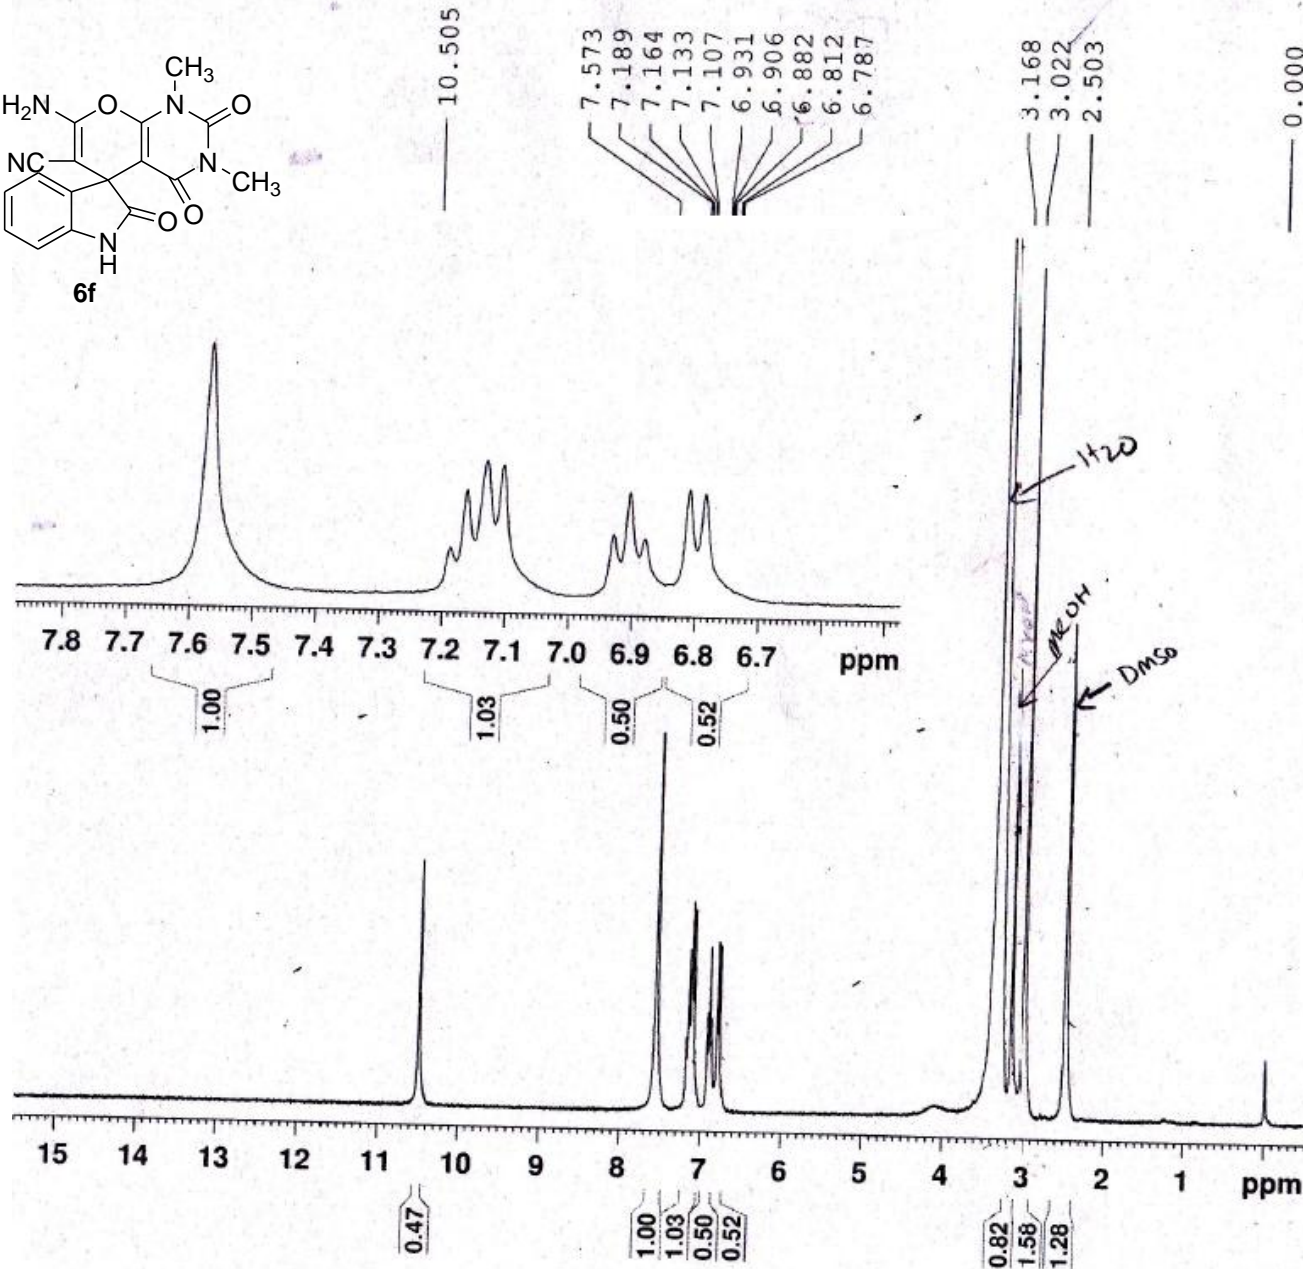

Current Data Parameters  
 NAME 1035SS  
 EXPNO 1  
 PROCNO 1

F2 - Acquisition Parameters  
 Date\_ 20141010  
 Time 13.40  
 INSTRUM spect  
 PROBHD 5 mm BBO BB-1H  
 PULPROG zg30  
 TD 65536  
 SOLVENT DMSO  
 NS 16  
 DS 2  
 SWH 6188.119 Hz  
 FIDRES 0.094423 Hz  
 AQ 5.2953587 sec  
 RG 228  
 DW 80.800 usec  
 DE 6.00 usec  
 TE 300.0 K  
 D1 1.00000000 sec  
 TD0 1

===== CHANNEL f1 =====  
 NUC1 1H  
 P1 8.60 usec  
 PL1 -2.00 dB  
 SFO1 300.1318534 MHz

F2 - Processing parameters  
 SI 32768  
 SF 300.1300006 MHz  
 WDW EM  
 SSB 0  
 LB 0.30 Hz  
 GB 0  
 PC 1.00

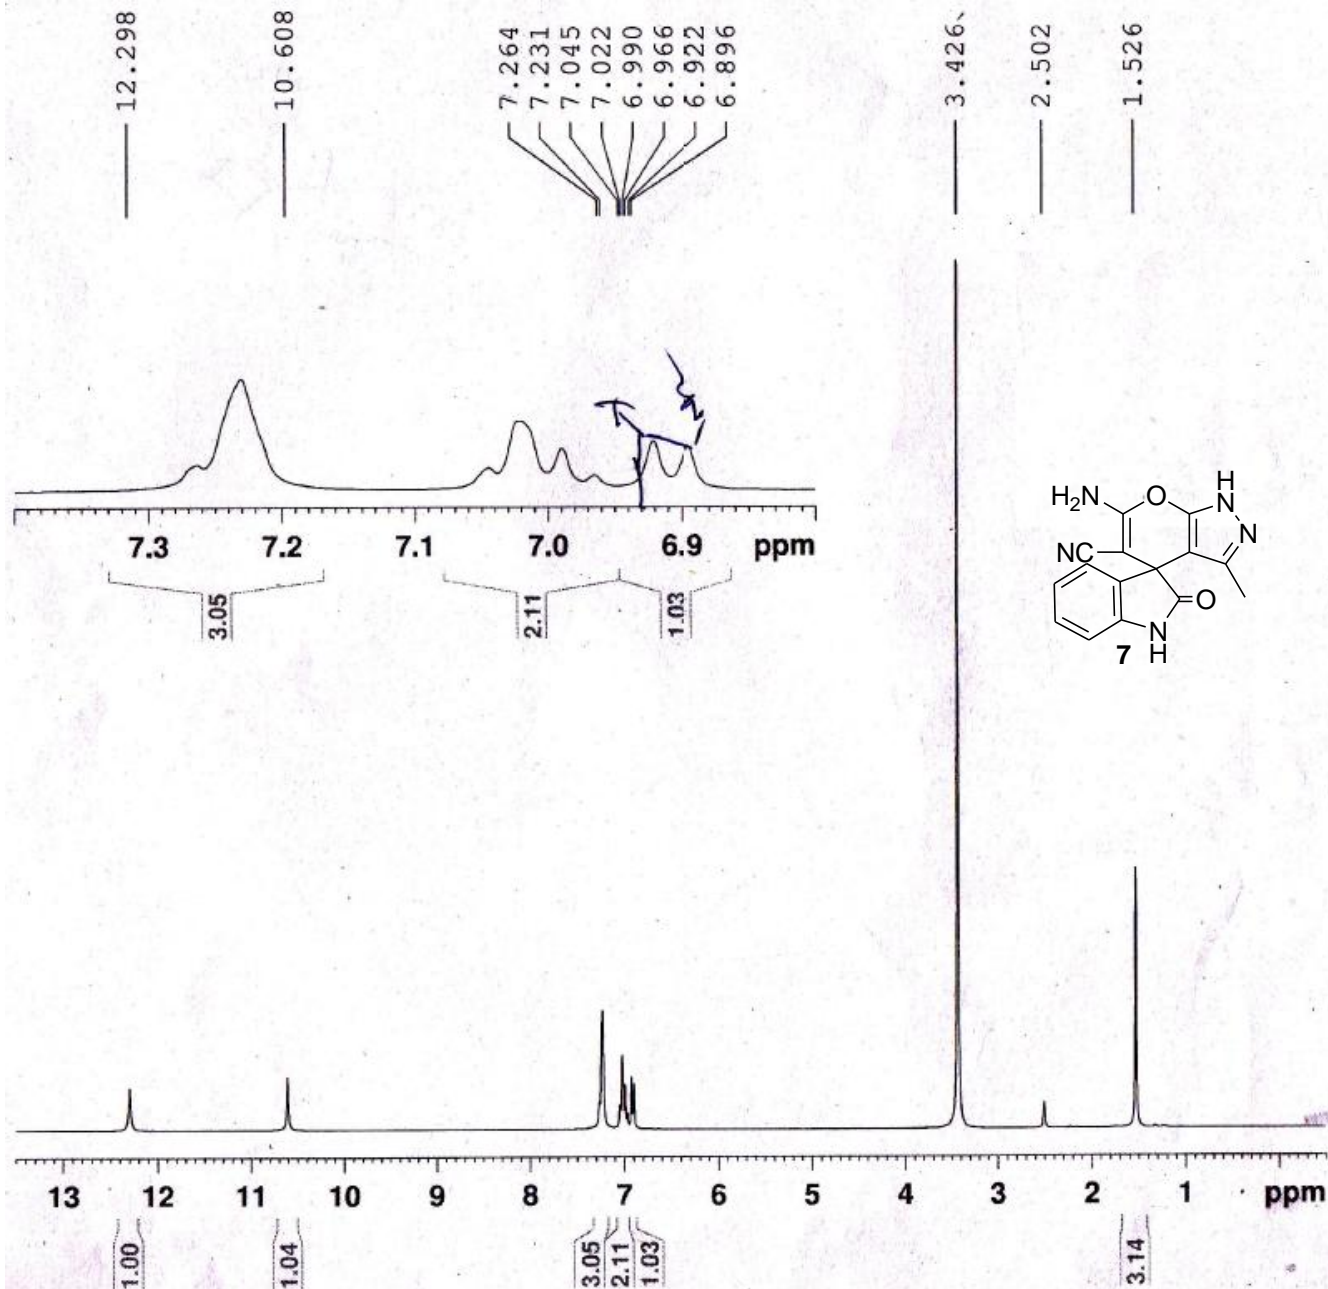

Current Data Parameters  
 NAME 1116A  
 EXPNO 1  
 PROCNO 1

F2 - Acquisition Parameters  
 Date\_ 20141104  
 Time 14.20  
 INSTRUM spect  
 PROBHD 5 mm BBO BB-1H  
 PULPROG zg30  
 ID 65536  
 SOLVENT DMSO  
 NS 16  
 DS 2  
 SWH 6188.119 Hz  
 FIDRES 0.094423 Hz  
 AQ 5.2953587 sec  
 RG 114  
 DW 80.800 usec  
 DE 6.00 usec  
 TE 300.0 K  
 D1 1.00000000 sec  
 TD0 1

===== CHANNEL f1 =====  
 NUC1 1H  
 P1 8.60 usec  
 PL1 -2.00 dB  
 SFO1 300.1318534 MHz

F2 - Processing parameters  
 SI 32768  
 SF 300.1300000 MHz  
 WDW EM  
 SSB 0  
 LB 0.30 Hz  
 GB 0  
 PC 1.00
